# Supplementary material
Source: publisher figshare collection journal article supplement (https://geolsoc.figshare.com/articles/dataset/_/3453596)
Supplement: Supplementary file 1 [file 1]

## **Supplementary material**

### **S1. Table of sample locations**

| <b>Sample</b> | <b>Rock type</b>                 | <b>Location</b>           | <b>Region</b>               | <b>GPS</b>            | <b>U-Pb/ Nd</b> |
|---------------|----------------------------------|---------------------------|-----------------------------|-----------------------|-----------------|
| 12            | Quartzo-feldspathic metasediment | Takdah                    | Darjeeling hills, W. Bengal | N27 00.810 E88 25.369 | U-Pb            |
| 32            | Orthogneiss                      | Rongli- Lingtam           | East Sikkim                 | N27 13.200 E88 43.786 | U-Pb            |
| 38x           | Quartzo-feldspathic metasediment | Paiyong, nr.Kalimpong     | Kalimpong hills, W.Bengal   | N27 06.128 E88 32.542 | U-Pb            |
| 49            | Orthogneiss                      | Tashi viewpoint, Gangtok  | North Sikkim                | N27 21.472 E88 37.403 | U-Pb            |
| 51x           | garnet-staurolite-kyanite schist | Gangtok-Mangan waterwheel | North Sikkim                | N27 25.159 E88 37.530 | Nd              |
| 53            | garnet schist                    | Rang Rang                 | North Sikkim                | N27 27.958 E88 31.473 | Nd              |
| 57            | Garnet fibrolite schist          | Myang                     | North Sikkim                | N27 31.642 E88 36.396 | Nd              |
| 58            | Orthogneiss                      | Manul                     | North Sikkim                | N27 30.864 E88 34.964 | U-Pb            |
| 59a           | garnet-staurolite-kyanite schist | Singhik                   | North Sikkim                | N27 30.956 E88 33.454 | Nd              |
| 64a           | sillimanite mica schist          | Toong                     | North Sikkim                | N27 33.637 E88 39.152 | Nd              |
| 66            | garnet gneiss                    | Chungthang-Lachung        | North Sikkim                | N27 37.233 E88 39.729 | Nd              |
| 82            | garnet mica schist               | Pedong                    | Kalimpong hills- W.Bengal   | N27 07.153 E88 35.209 | Nd              |
| 94            | garnet mica                      | Sangkalang                | North Sikkim                | N27 31.965 E88        | Nd              |

|      |                                              |                    |                              |                          |      |
|------|----------------------------------------------|--------------------|------------------------------|--------------------------|------|
|      | schist                                       |                    |                              | 30.591                   |      |
| 97   | mica schist                                  | Mangan petrol pump | North Sikkim                 | N27 29.534 E88<br>31.686 | Nd   |
| 106  | garnet mica schist                           | Rishop             | Kalimpong hills-<br>W.Bengal | N27 06.357 E88<br>38.734 | Nd   |
| 115  | Orthogneiss                                  | Lava               | Kalimpong hills,<br>W.Bengal | N27 04.993 E88<br>40.191 | U-Pb |
| 123  | fibrolite mica schist                        | Neora valley       | Kalimpong hills-<br>W.Bengal | N27 06.170 E88<br>40.405 | Nd   |
| 147  | kyanite-<br>fibrolite schist                 | Lava road          | Kalimpong hills-<br>W.Bengal | N27 01.742 E88<br>42.062 | Nd   |
| 149  | chlorite-<br>muscovite<br>phyllite           | Lava road          | Kalimpong hills-<br>W.Bengal | N27 00.124 E88<br>41.876 | Nd   |
| 156  | garnet mica schist                           | Lolaygoan          | Kalimpong hills-<br>W.Bengal | N27 04.290 E88<br>36.886 | Nd   |
| 159  | fibrolite mica schist                        | Lolaygoan          | Kalimpong hills-<br>W.Bengal | N27 01.117 E88<br>33.829 | Nd   |
| 161  | Quartzite                                    | Lolaygoan          | Kalimpong hills,<br>W.Bengal | N27 03.395 E88<br>34.359 | U-Pb |
| 203  | Quartz-rich metasediment                     | Dikchu             | North/<br>Central Sikkim     | N27 24.794 E88<br>30.940 | U-Pb |
| 211  | Quartzite                                    | Rongli Dam         | East Sikkim                  | N27 12.332 E88<br>42.810 | U-Pb |
| 214x | garnet-<br>kyanite-<br>sillimanite<br>gneiss | Yoksom             | West Sikkim                  | N27 21.362 E88<br>13.237 | Nd   |

|      |                                          |                     |              |                          |      |
|------|------------------------------------------|---------------------|--------------|--------------------------|------|
| 233  | Orthogneiss                              | Pelling-Yoksom road | West Sikkim  | N27 18.405 E88<br>11.967 | U-Pb |
| 245  | Orthogneiss                              | Pelling-Dentam road | West Sikkim  | N27 16.669 E88<br>10.075 | U-Pb |
| 246a | sillimanite<br>mica schist               | Dentam              | West Sikkim  | N27 16.456 E88<br>10.333 | Nd   |
| 267  | garnet-2nd<br>sillimanite<br>gneiss      | Kabur               | West Sikkim  | N27 15.512 E88<br>09.255 | Nd   |
| 275  | garnet<br>fibrolite schist               | Pelling             | West Sikkim  | N27 18.308 E88<br>12.495 | Nd   |
| 278  | garnet-<br>staurolite-<br>kyanite schist | Pelling             | West Sikkim  | N27 18.015 E88<br>13.286 | Nd   |
| 280  | Orthogneiss                              | Lachung             | North Sikkim | N27 41.159 E88<br>44.312 | U-Pb |
| 292  | Quartzite                                | Chungthang          | North Sikkim | N27 36.094 E88<br>38.741 | U-Pb |

## S2. Photomicrographs of samples

### 12- quartzo-feldspathic metasedimentary rock

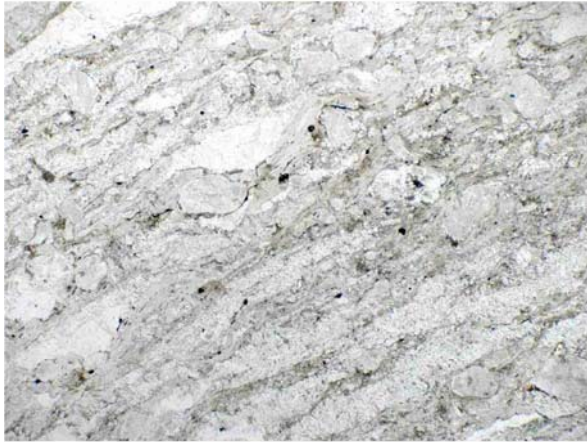

PPL- 28 mm field of view

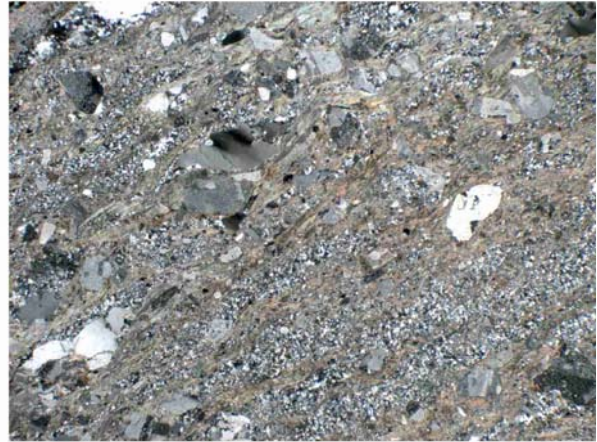

XPL- 28 mm field of view

### 32- orthogneiss

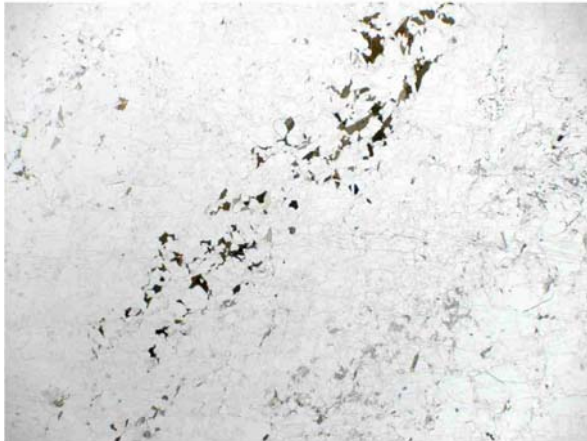

PPL- 25 mm field of view

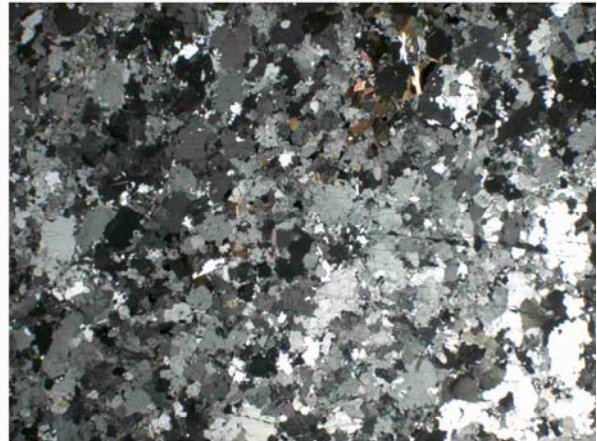

XPL- 25 mm field of view

### 32- melt textures

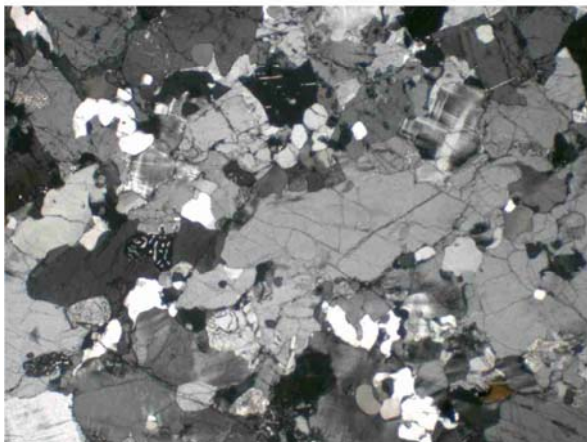

XPL- 4 mm field of view (melt textures)



**38x- quartzo-feldspathic metasedimentary rock**

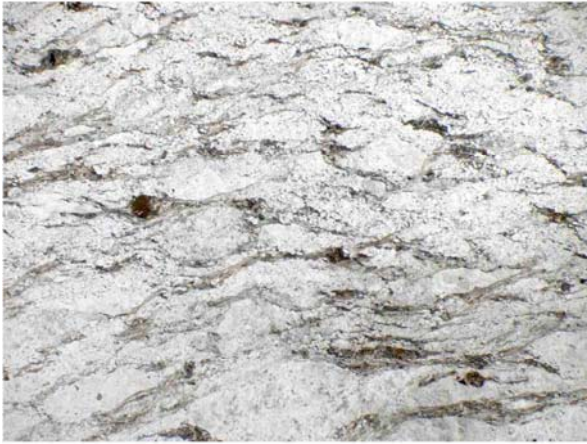

PPL- 14 mm field of view

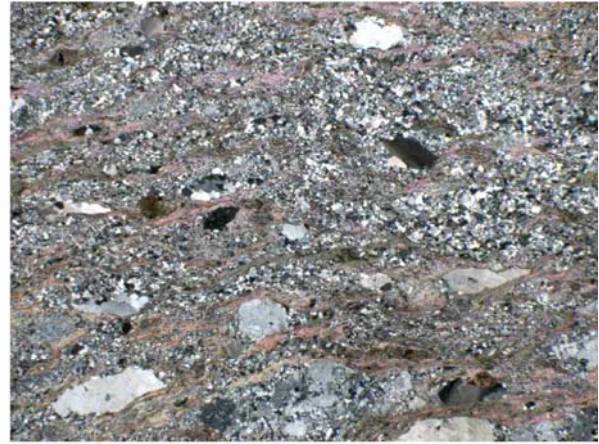

XPL- 14 mm field of view

**49- orthogneiss (micaceous)**

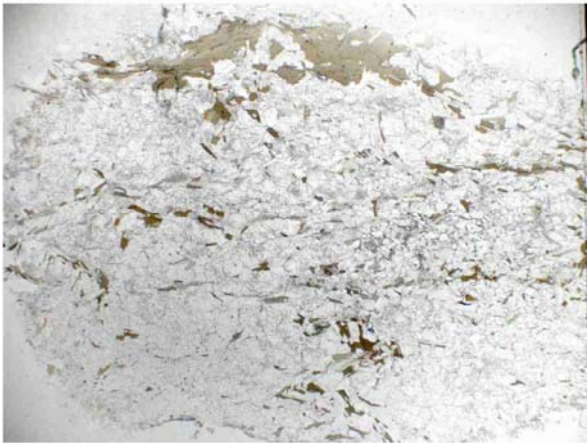

PPL- 28 mm field of view

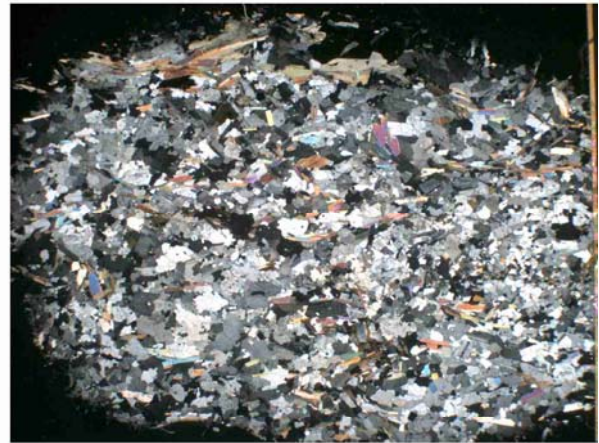

XPL- 28 mm field of view

**51x- garnet-staurolite-kyanite schist**

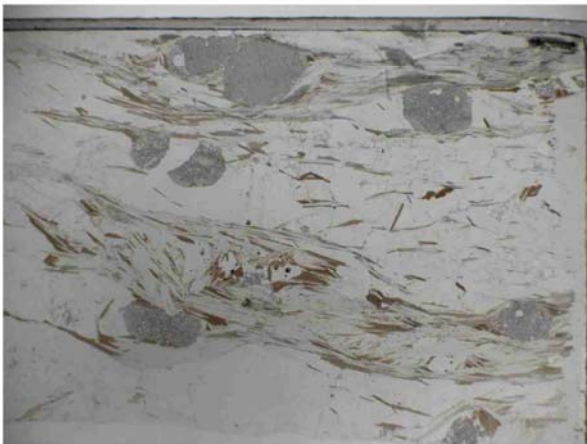

PPL- 26 mm field of view

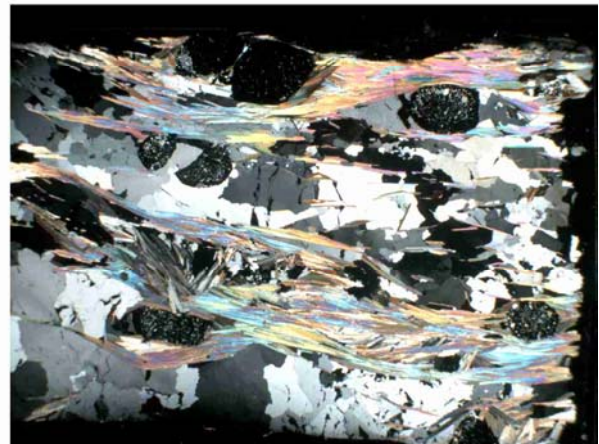

XPL- 26 mm field of view



**51x- key minerals**

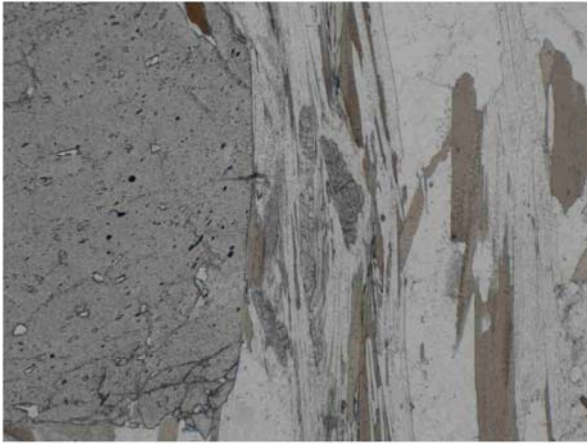

PPL- 3.5 mm field of view (garnet + kyanite)

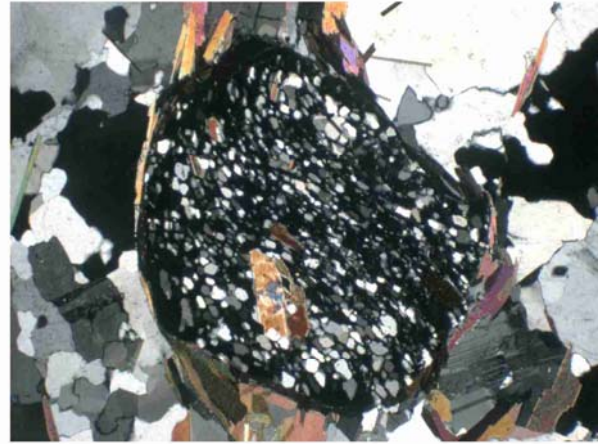

XPL- 4 mm field of view (garnet)

**53- garnet mica schist**

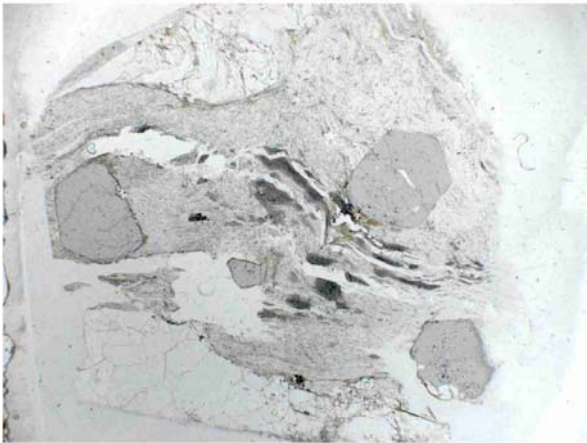

PPL- 25 mm field of view

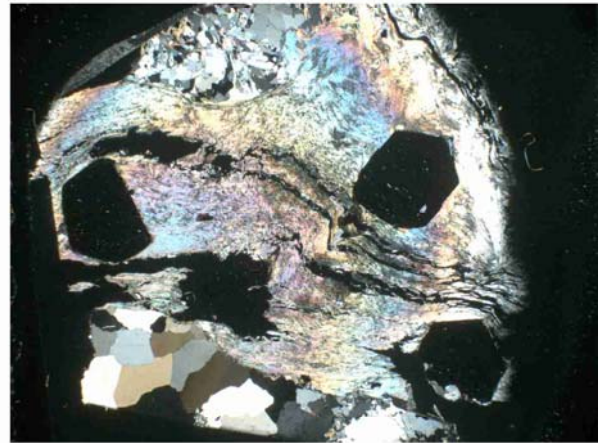

XPL- 25 mm field of view

**57- garnet-fibrolite schist**

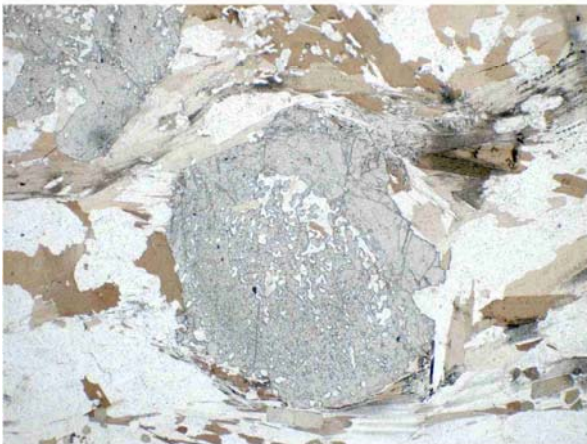

PPL- 7 mm field of view

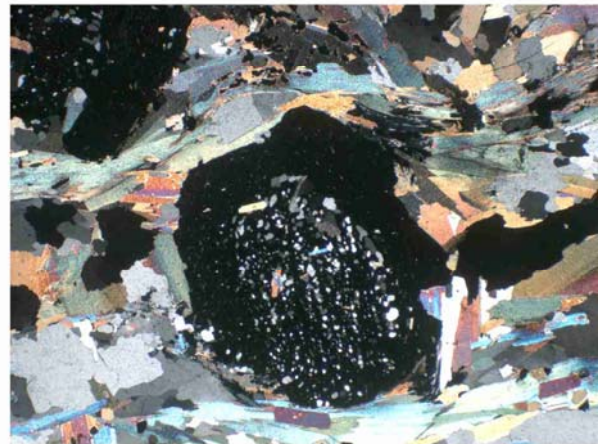

XPL- 7 mm field of view



**58- orthogneiss**

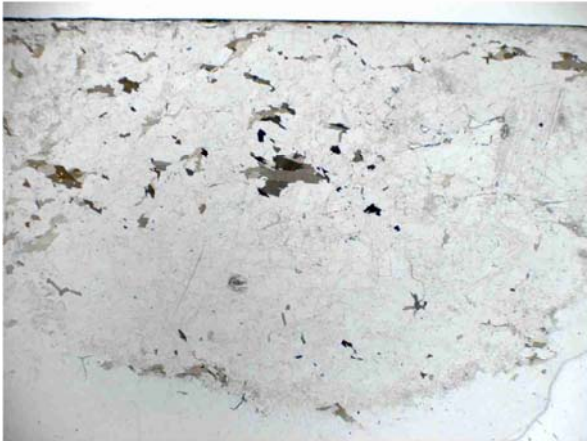

PPL- 28 mm field of view

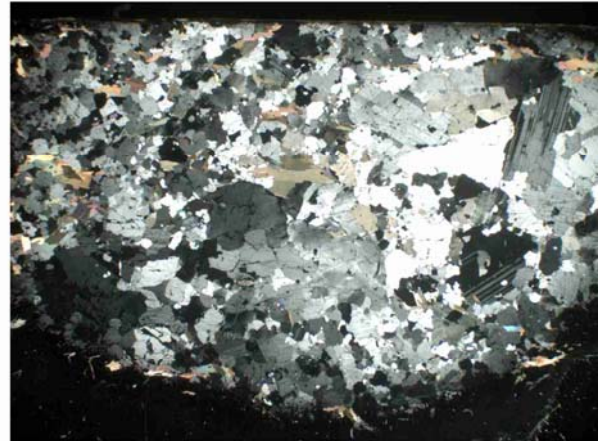

XPL- 28 mm field of view

**59a- garnet-staurolite-kyanite schist**

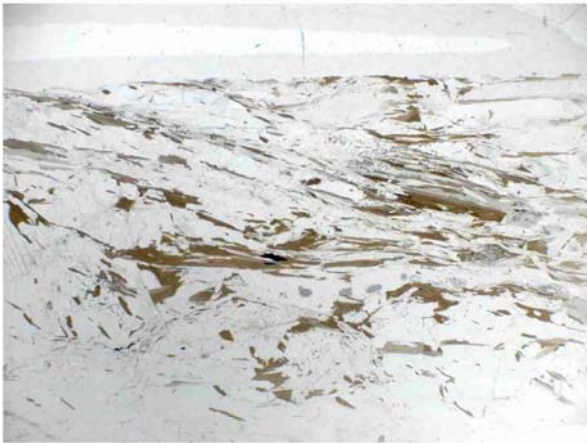

PPL- 27 mm field of view

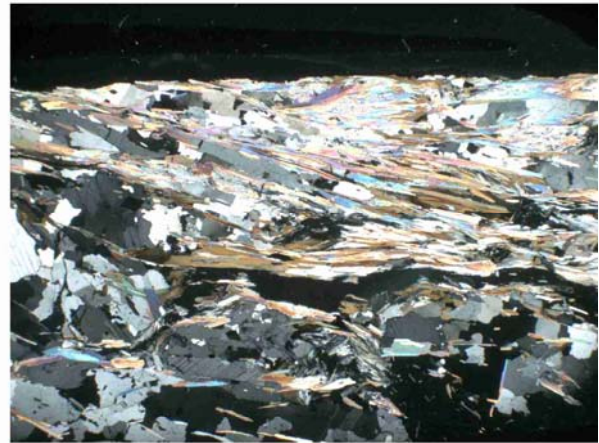

XPL- 27 mm field of view

**64a- sillimanite-mica schist**

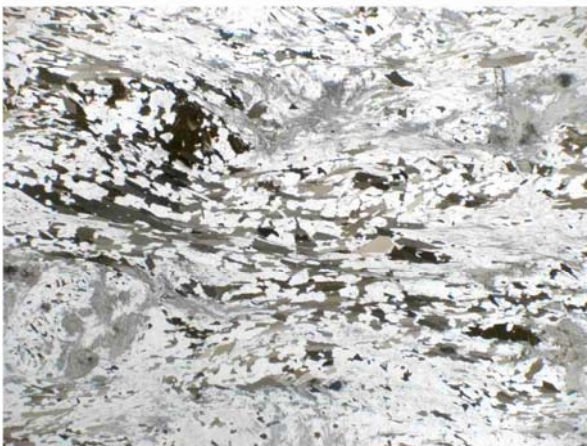

PPL- 20 mm field of view

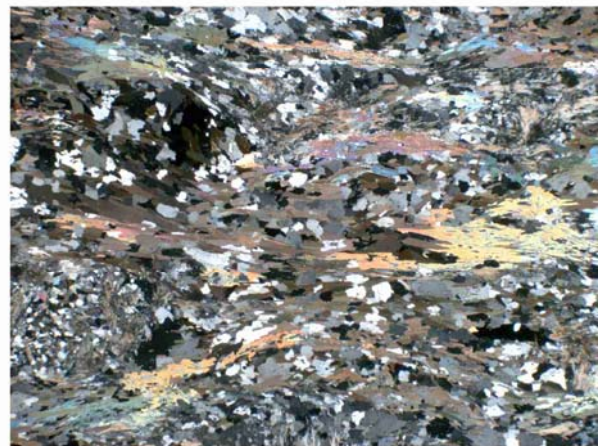

XPL- 20 mm field of view



**66- garnet gneiss**

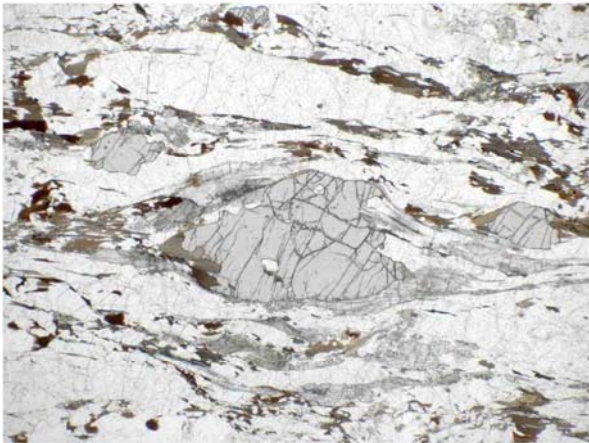

PPL- 9 mm field of view

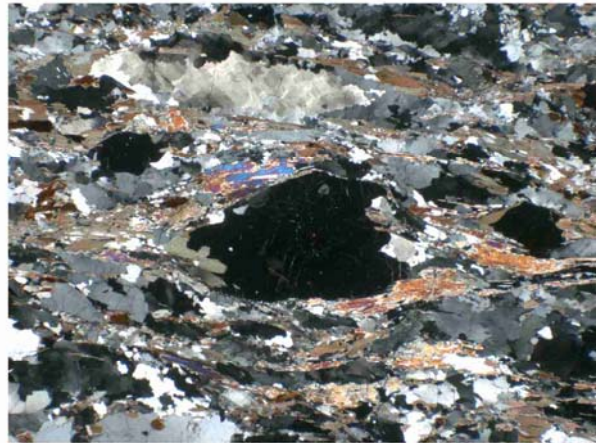

XPL- 9 mm field of view

**82- garnet-mica schist**

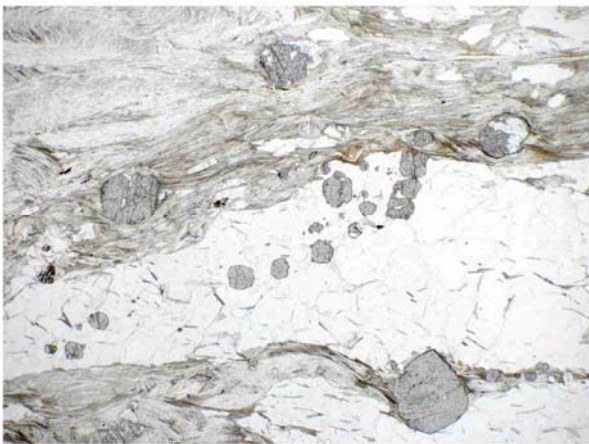

PPL- 22 mm field of view

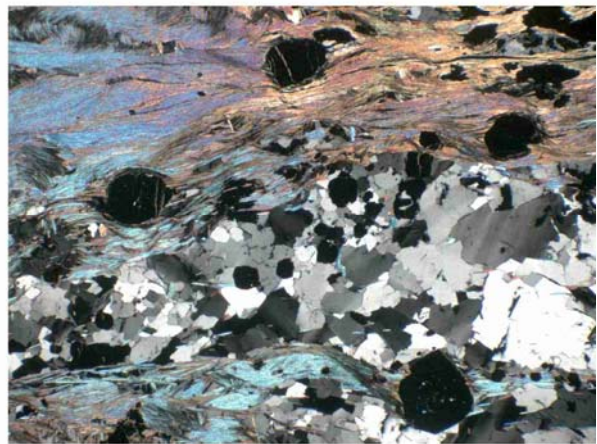

XPL- 22 mm field of view

**94 garnet-mica schist**

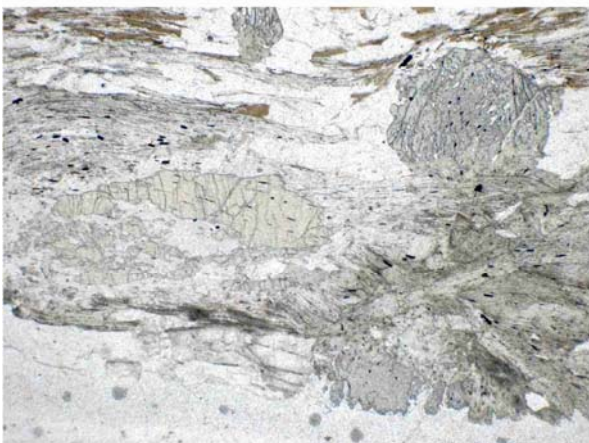

PPL- 7 mm field of view

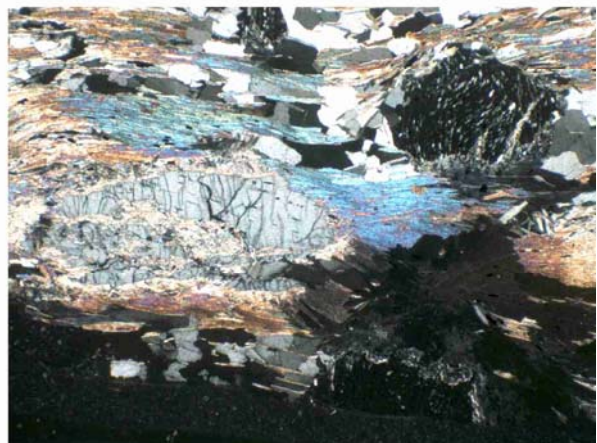

XPL- 7 mm field of view



**97- mica schist**

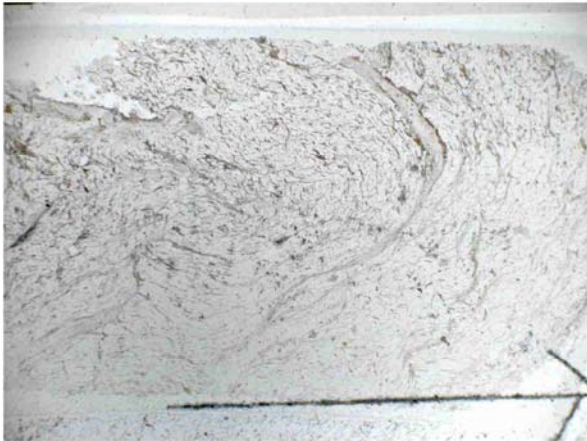

PPL- 28 mm field of view

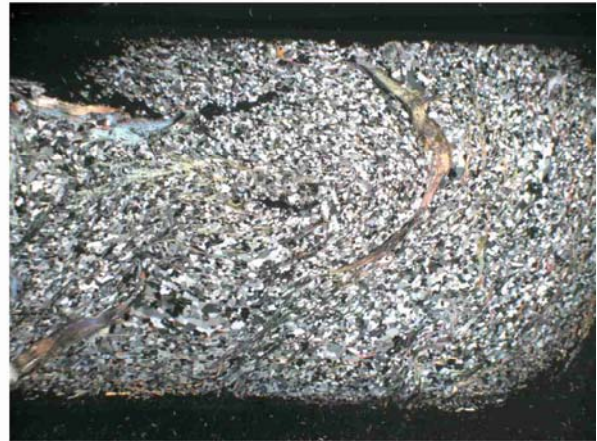

XPL- 28 mm field of view

**106- garnet-mica schist**

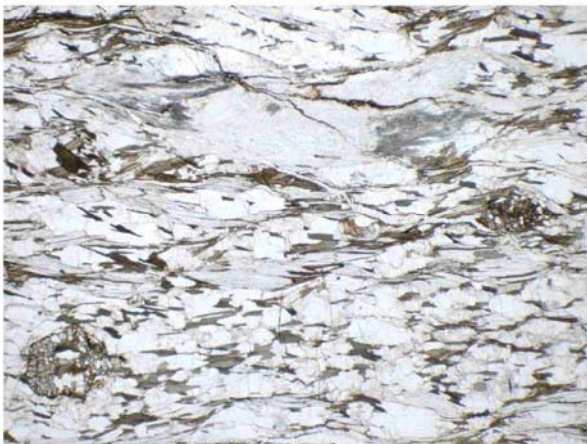

PPL- 6 mm field of view

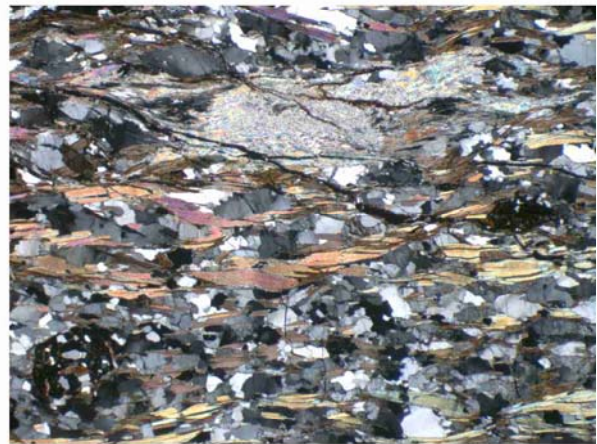

XPL- 6 mm field of view

**115 orthogneiss**

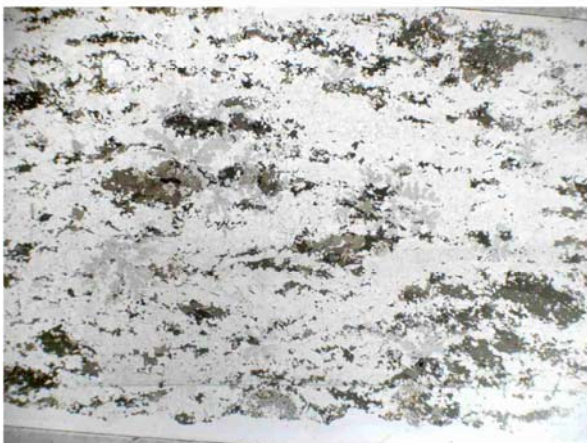

PPL- 28 mm field of view

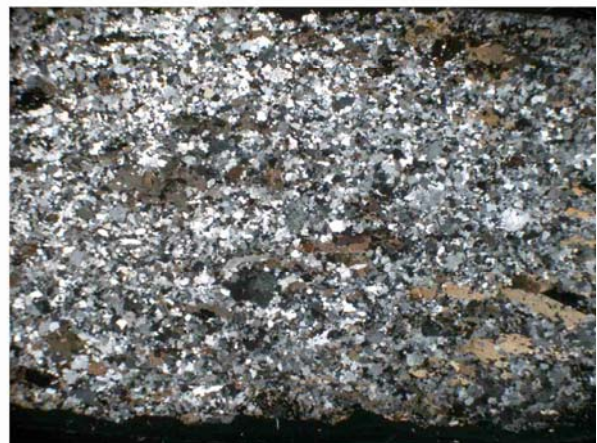

XPL- 28 mm field of view



**123- fibrolite mica schist**

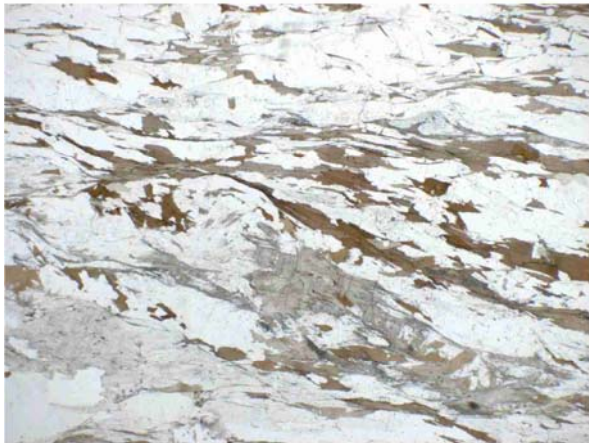

PPL- 28 mm field of view

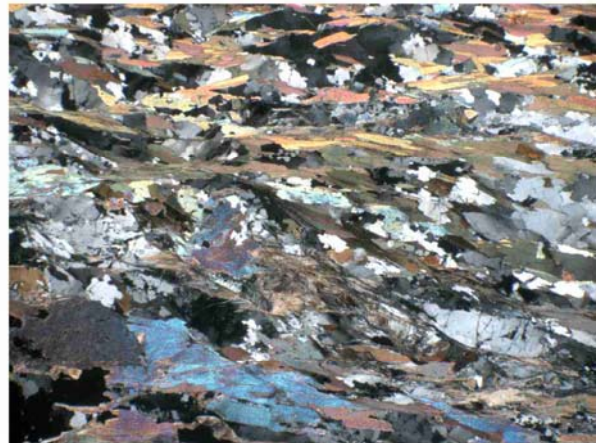

XPL- 28 mm field of view

**147- kyanite-fibrolite schist**

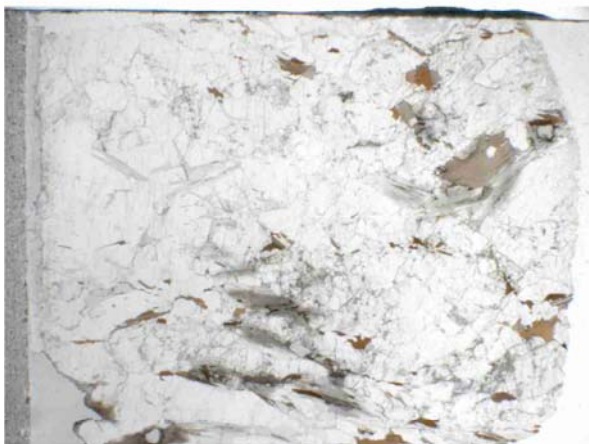

PPL- 28 mm field of view

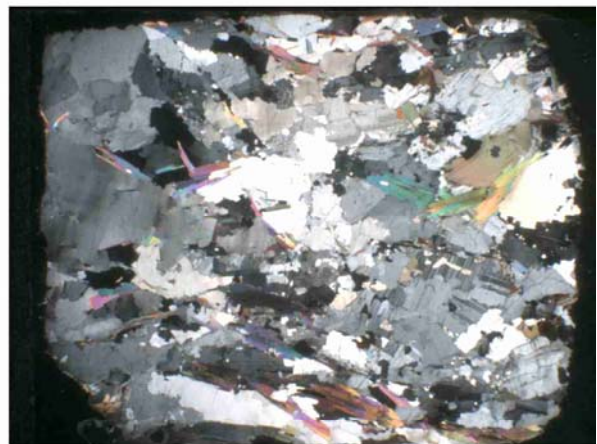

XPL- 28 mm field of view

**149- chlorite-muscovite schist**

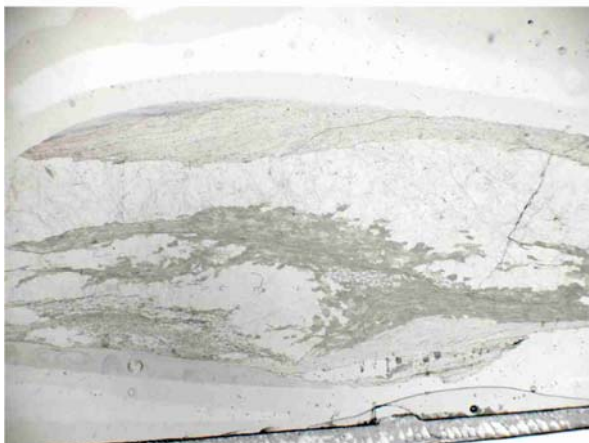

PPL- 28 mm field of view

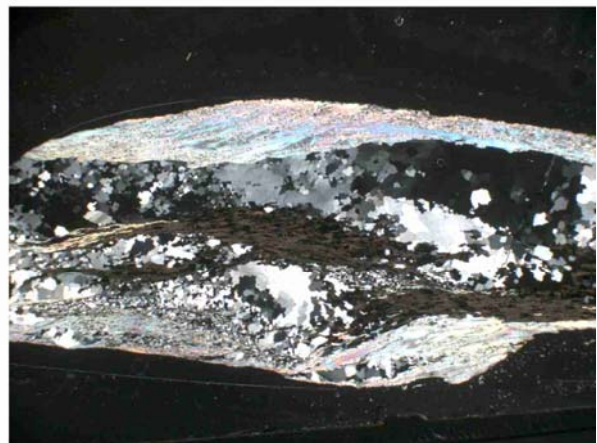

XPL- 28 mm field of view



**156- garnet mica schist**

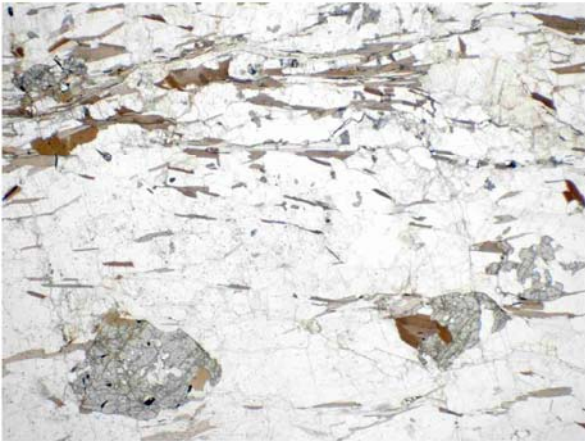

PPL- 28 mm field of view

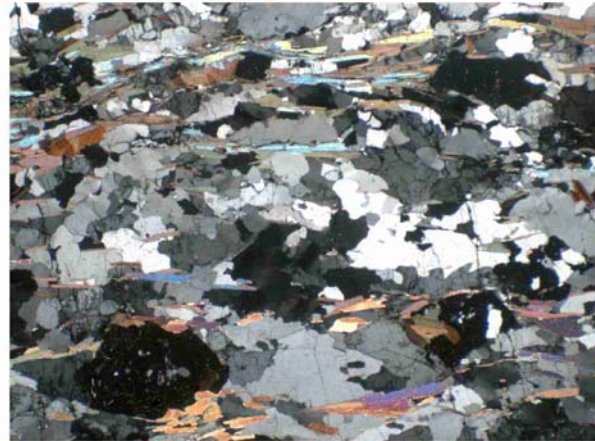

XPL- 28 mm field of view

**159- fibrolite-mica schist**

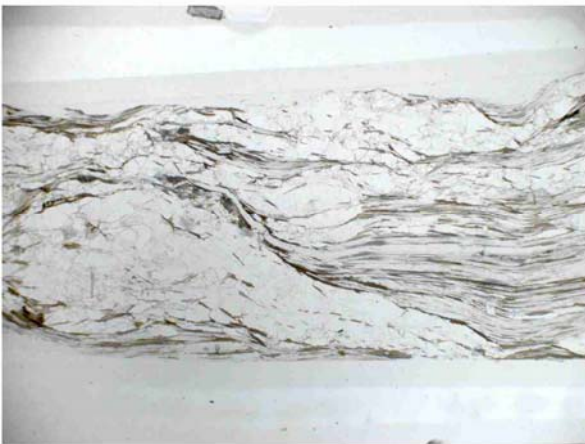

PPL- 28 mm field of view

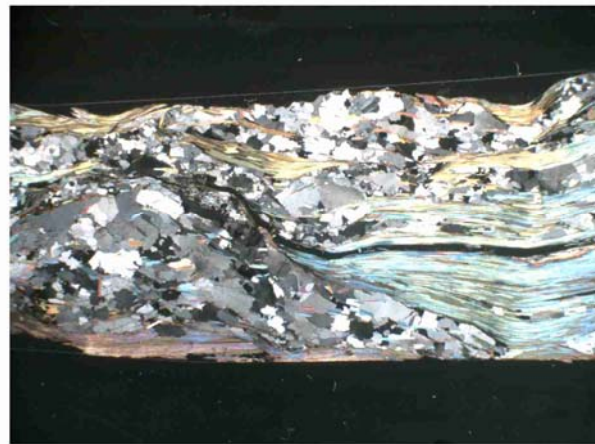

XPL- 28 mm field of view

**161- quartzite**

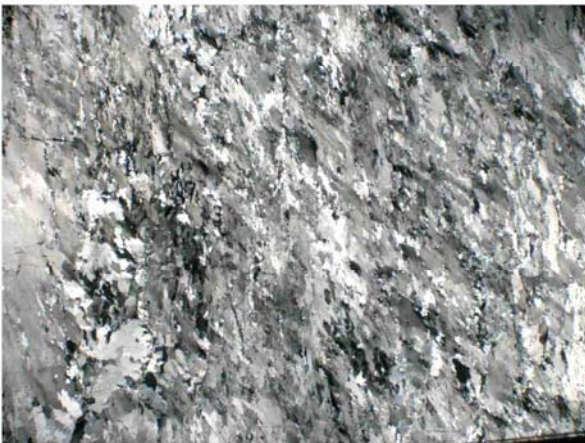

XPL- 28 mm field of view

**203- quart-rich metasedimentary rock**

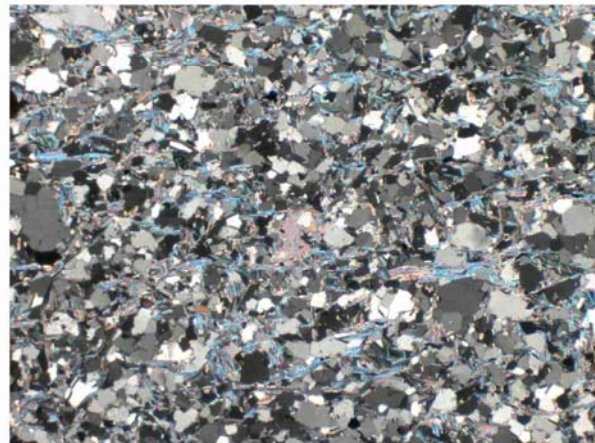

XPL- 28 mm field of view



**211- quartzite**

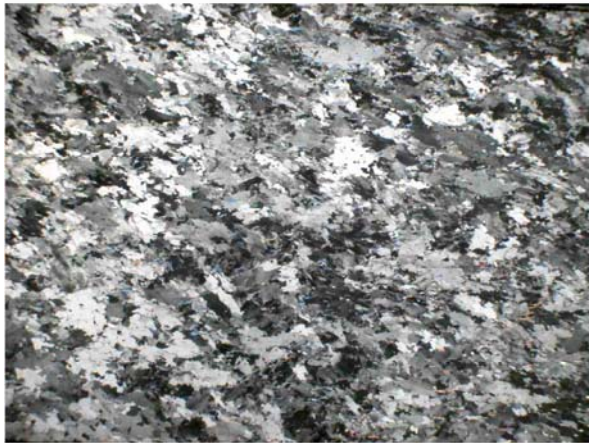

PPL- 28 mm field of view

**214x- garnet-kyanite-sillimanite gneiss**

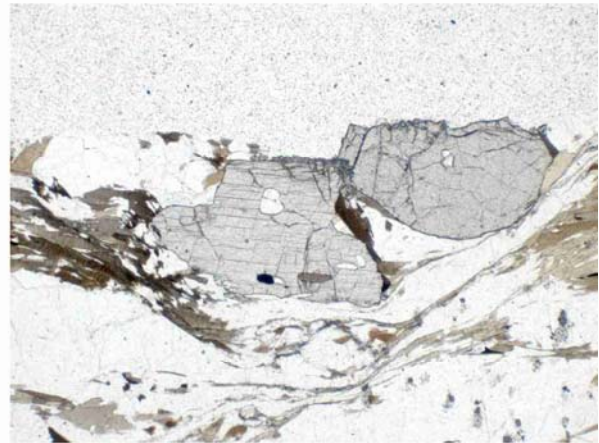

PPL- 4 mm field of view (garnet, kyanite)

**214x- garnet-kyanite-sillimanite gneiss**

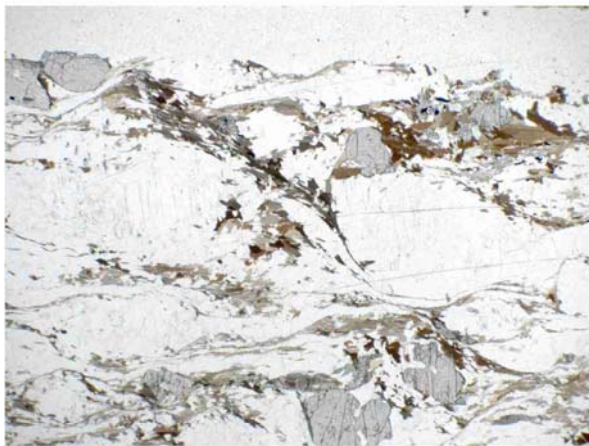

PPL- 28 mm field of view

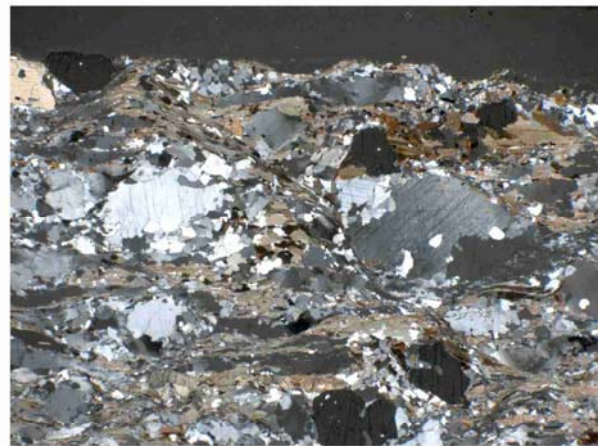

XPL- 28 mm field of view

**233- orthogneiss (micaceous)**

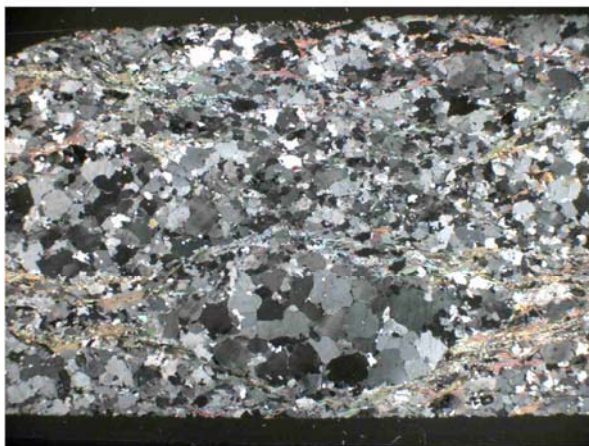

PPL- 28 mm field of view

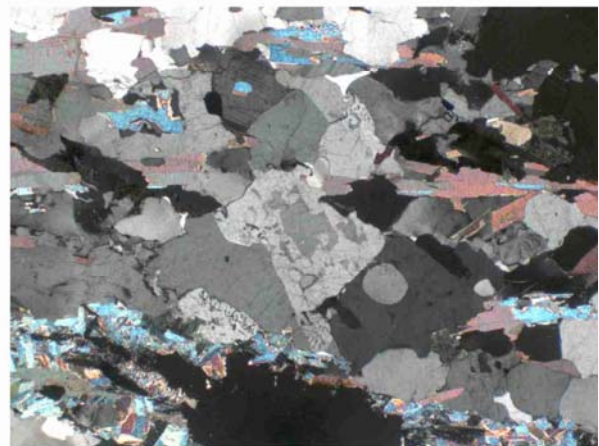

XPL- 3.5 mm field of view (melt texture)



**245- orthogneiss**

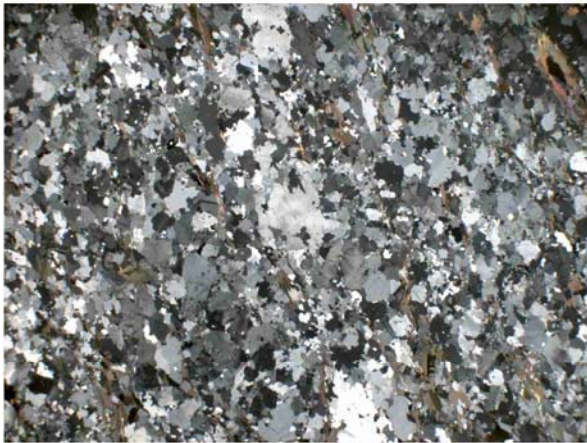

XPL- 28 mm field of view

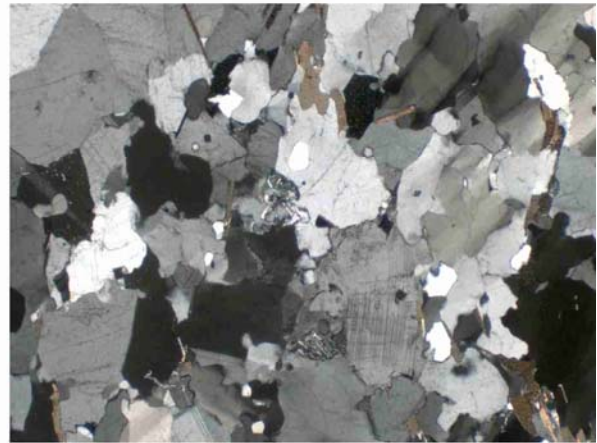

XPL- 3.5 mm field of view (melt texture)

**246a- sillimanite-mica schist**

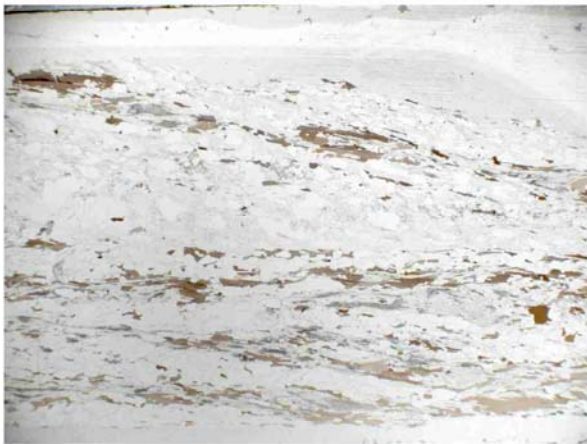

PPL- 28 mm field of view

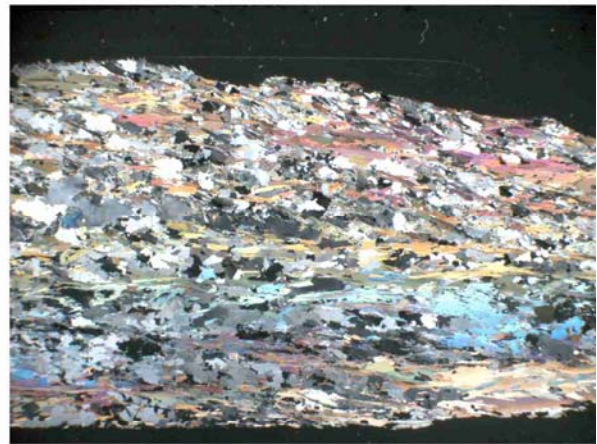

XPL- 28 mm field of view

**267- garnet-sillimanite gneiss**

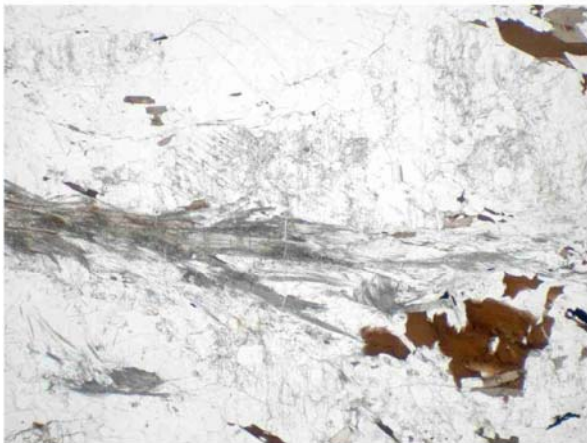

PPL- 5 mm field of view

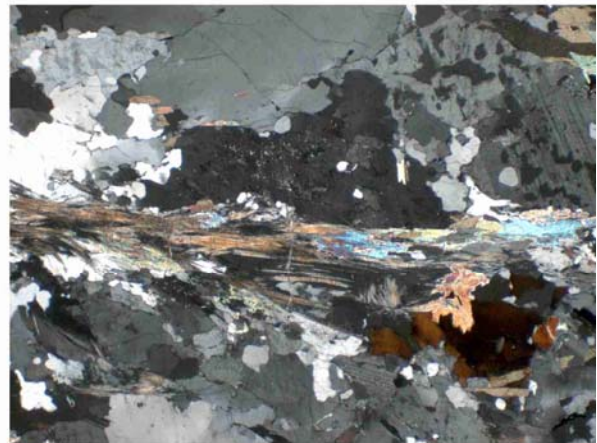

XPL- 5 mm field of view (melt texture)



**275- garnet fibrolite schist**

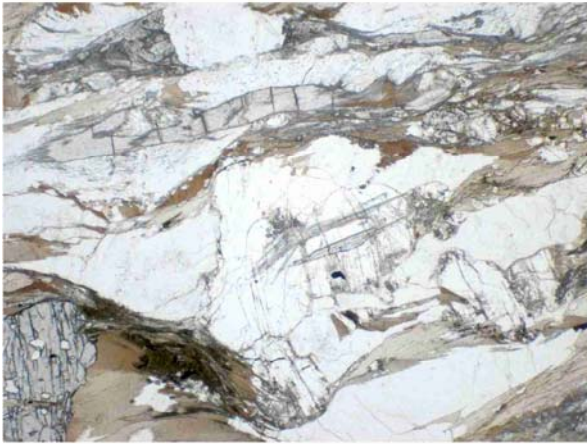

PPL- 4.5 mm field of view

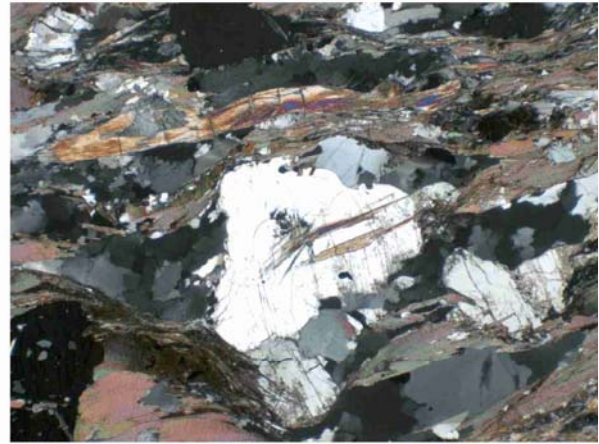

XPL- 4.5 mm field of view (melt texture)

**278- garnet-staurolite-kyanite schist**

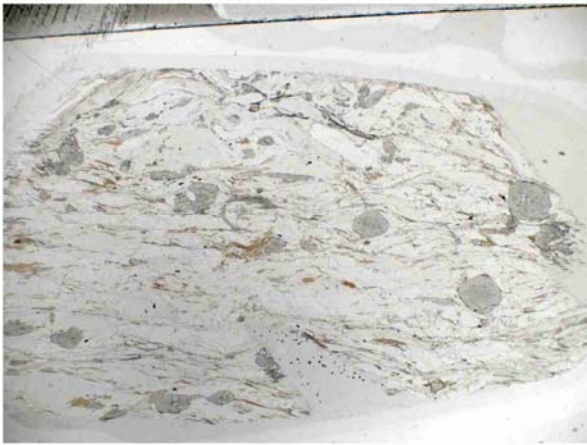

PPL- 28 mm field of view

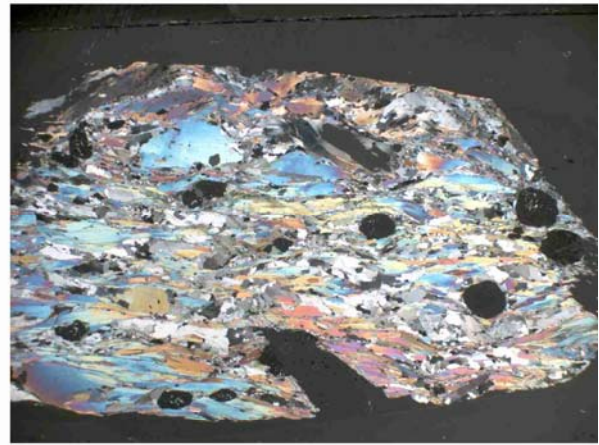

XPL- 28 mm field of view

**278- key minerals**

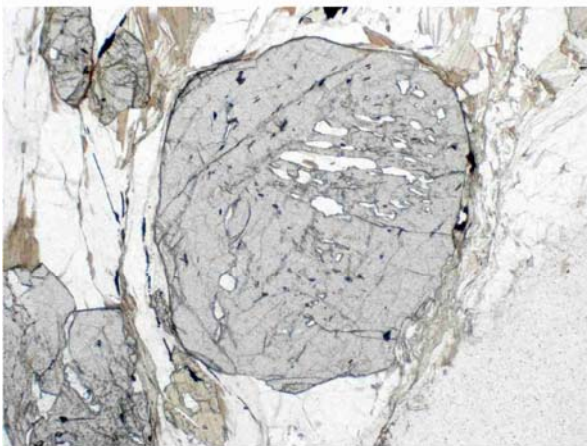

PPL- 3.5 mm field of view (garnet)

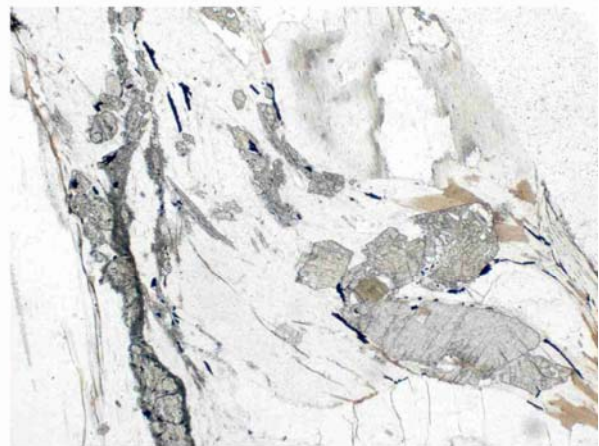

XPL- 3.5 mm field of view (garnet, staurolite, fibrolite)



**280- orthogneiss**

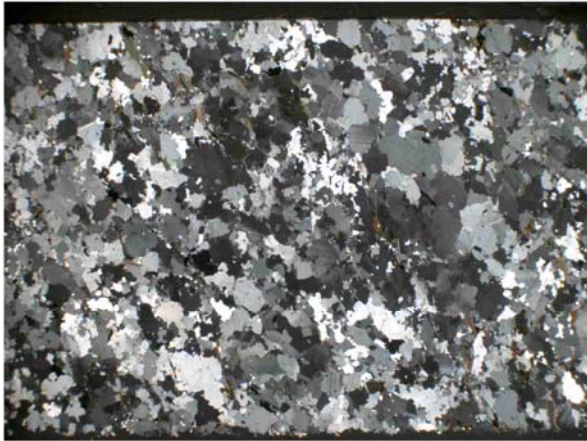

XPL- 28 mm field of view

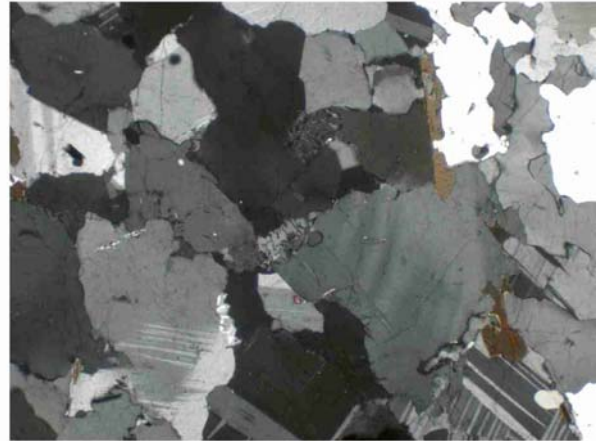

XPL- 3.5 mm field of view (melt texture)

**292- quartzite (sillimanite bearing)**

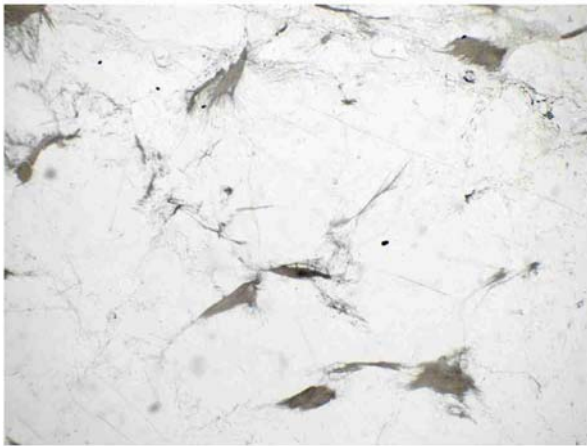

PPL- 28 mm field of view

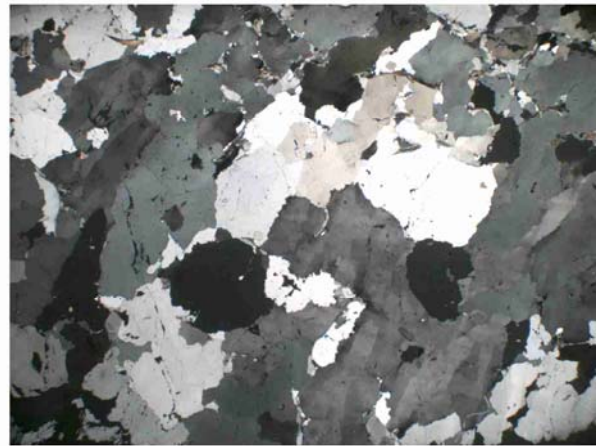

XPL- 8 mm field of view (close up)

Photomicrographs of all samples analysed for geochronology (detrital zircon and orthogneiss) and Nd geochemistry. Full sample descriptions and locations can be found in sample table x. PPL= Plane polarized light, XPL= cross polarised light.



### S3. Atlas of zircon Cathodoluminescence images

A representative selection of zircons from each detrital zircon/ orthogenesis sample analysed. All ages  $^{207}\text{Pb}/^{206}\text{Pb}$  ages ( $\pm 2\sigma$  abs). See appendix A5 zircon data table for full data set.

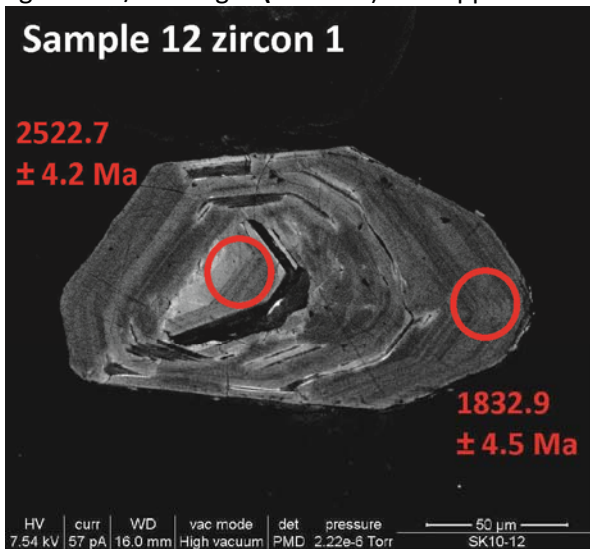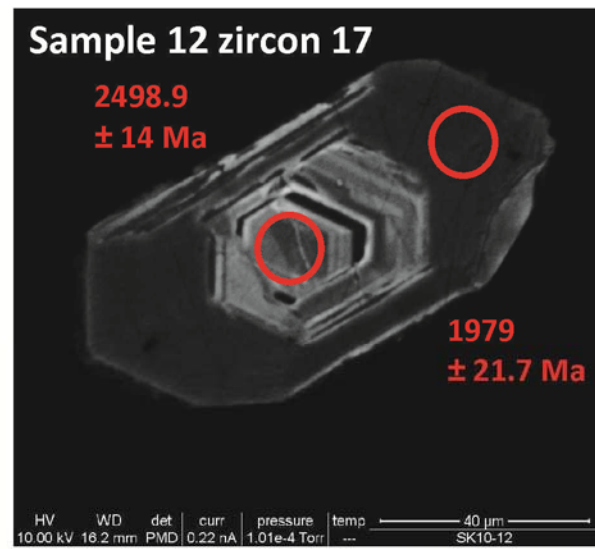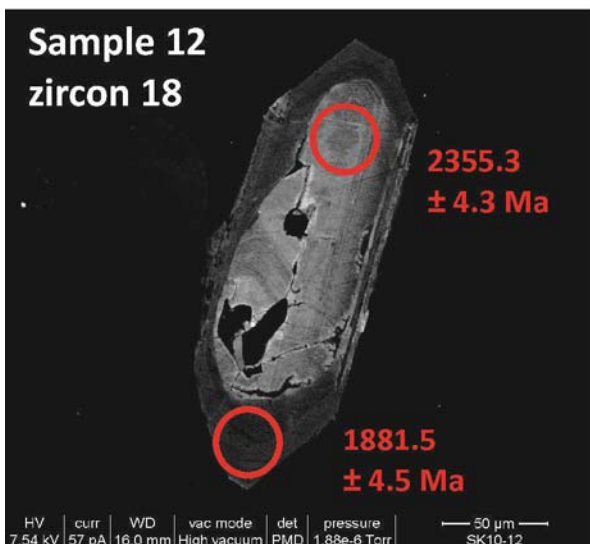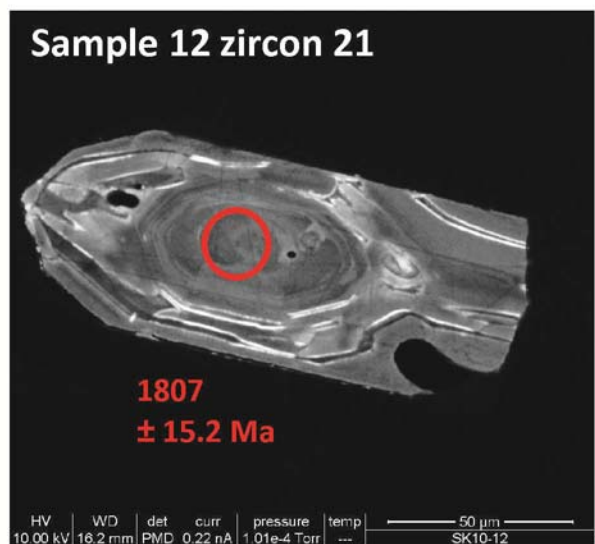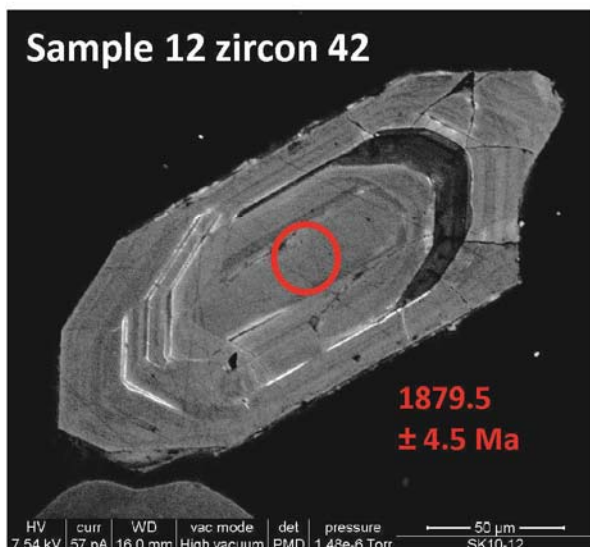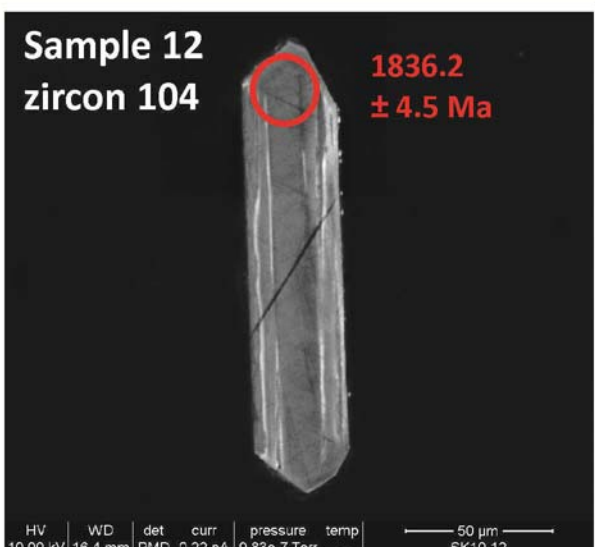



Sample 32 zircon 4L

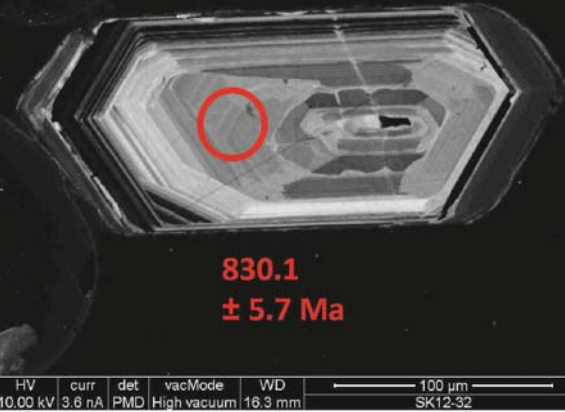

Sample 32 zircon 1M

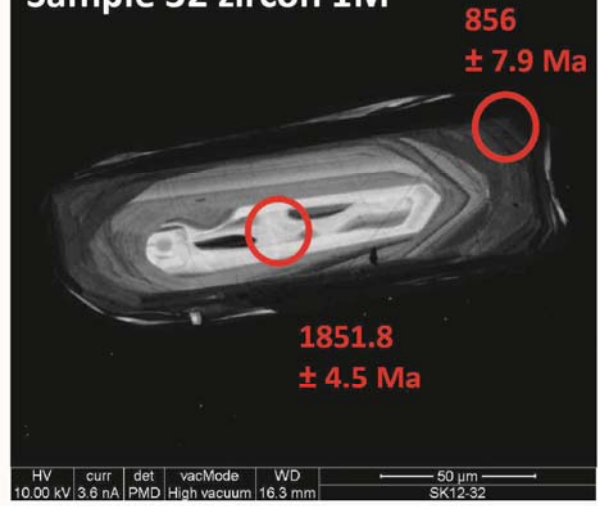

Sample 32 zircon 8M

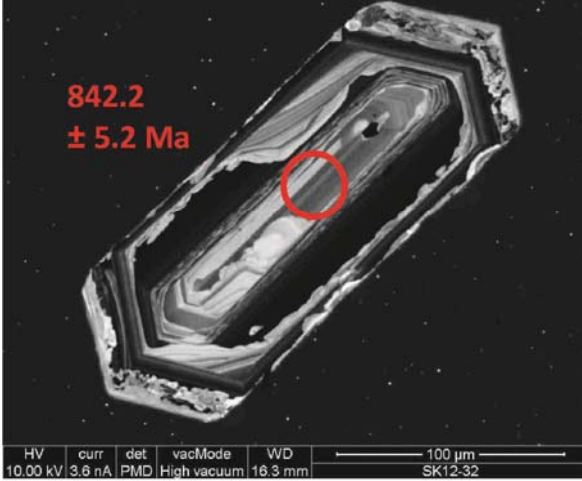

Sample 32 zircon 9M

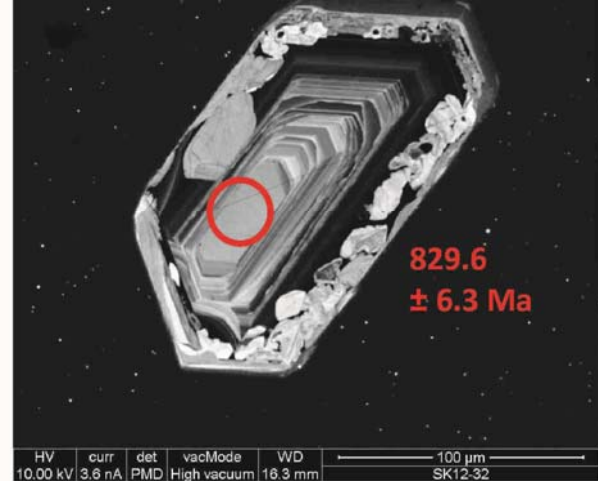

Sample 32 zircon 12S

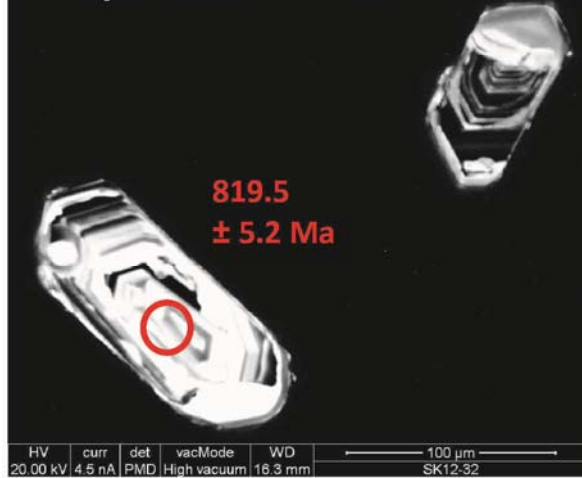

Sample 32 zircon 14S

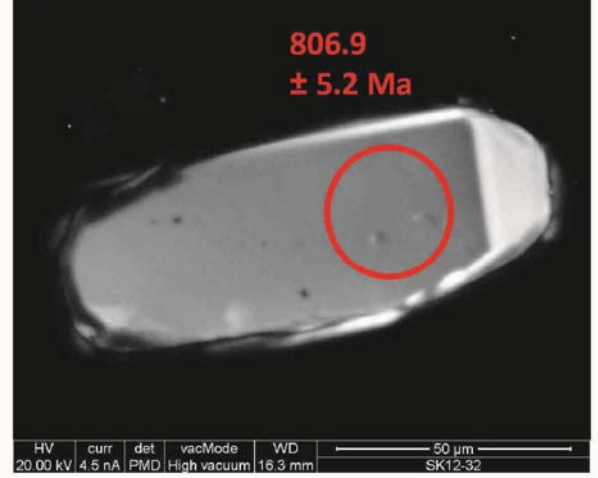



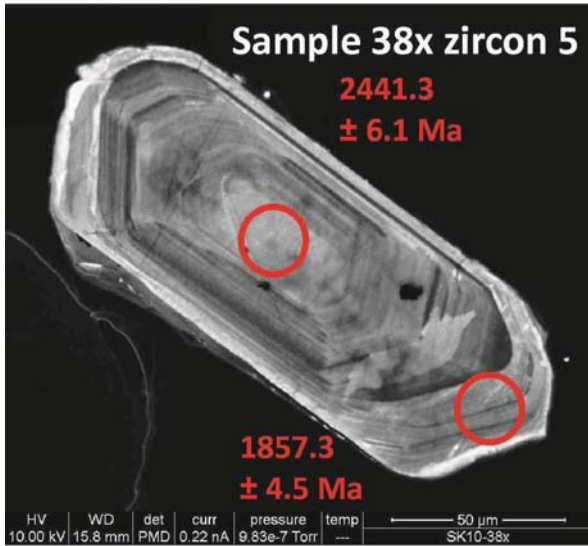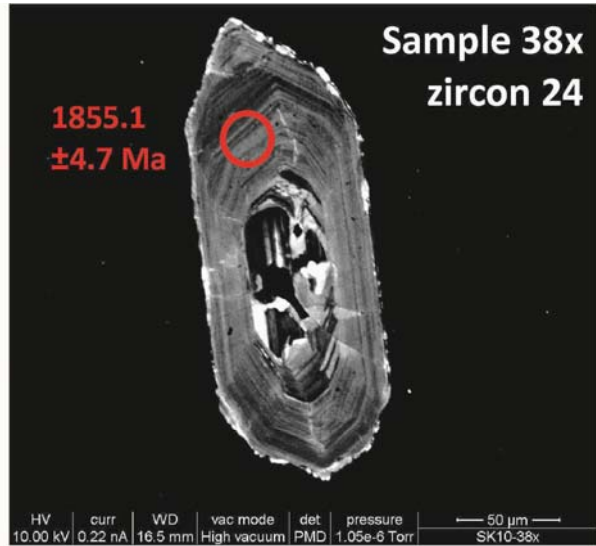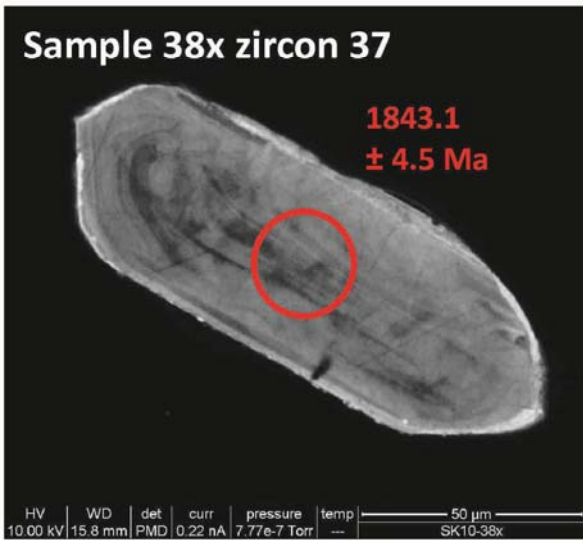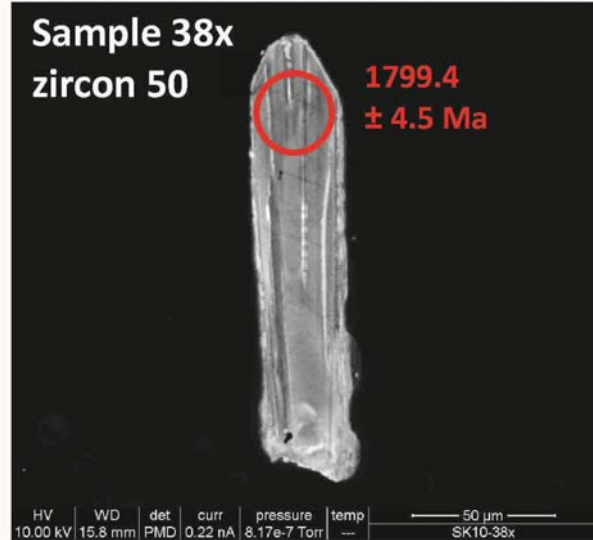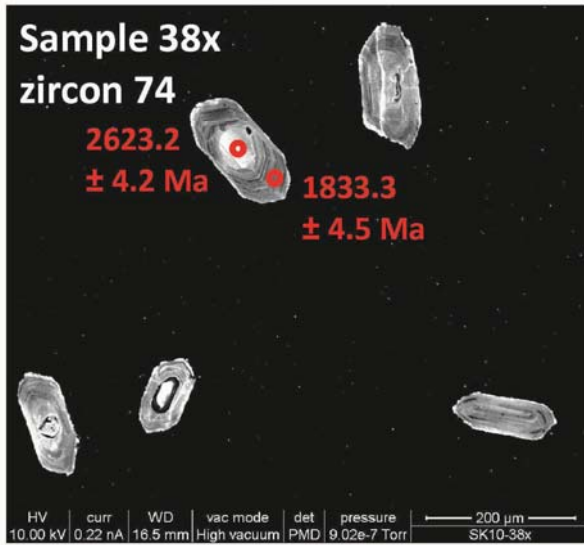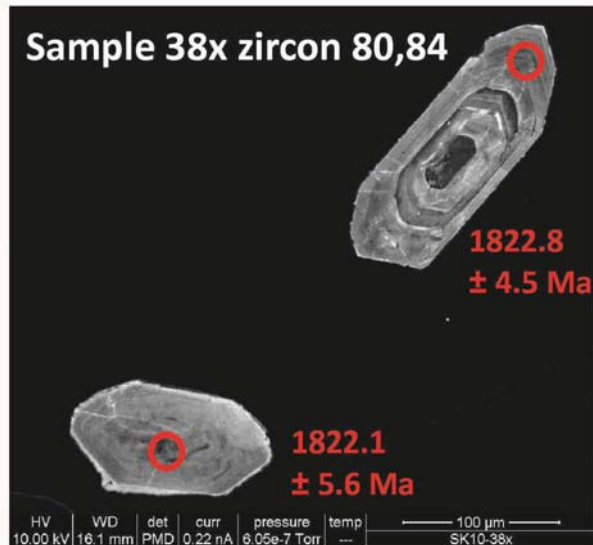



Sample 49  
zircon B3

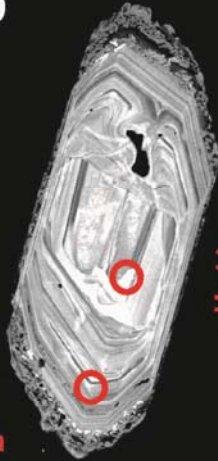

1830.2  
± 4.5 Ma

1889.5  
± 4.5 Ma

HV | curr | WD | vac mode | det | pressure | 100 μm  
10.00 kV | 0.22 nA | 16.5 mm | High vacuum | PMD | 1.78e-6 Torr | SK10-49o

Sample 49  
zircon B4

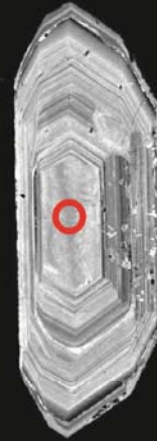

1826.2  
± 4.5 Ma

HV | curr | WD | vac mode | det | pressure | 100 μm  
10.00 kV | 0.22 nA | 16.5 mm | High vacuum | PMD | 1.73e-6 Torr | SK10-49o

Sample 49  
zircon C1

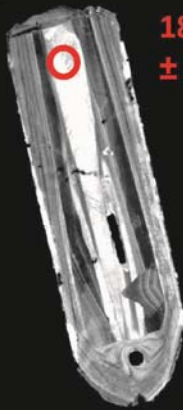

1823.5  
± 4.5 Ma

HV | curr | WD | vac mode | det | pressure | 100 μm  
10.00 kV | 0.22 nA | 16.5 mm | High vacuum | PMD | 1.73e-6 Torr | SK10-49o

Sample 49  
zircon C2

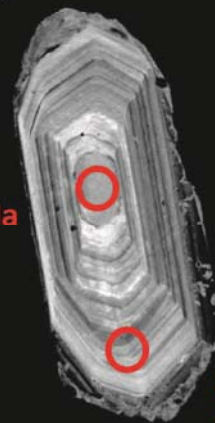

2077.8  
± 12.1 Ma

1839.4  
± 4.5 Ma

HV | curr | WD | vac mode | det | pressure | 50 μm  
10.00 kV | 0.22 nA | 16.5 mm | High vacuum | PMD | 1.73e-6 Torr | SK10-49o

Sample 49  
zircon D1

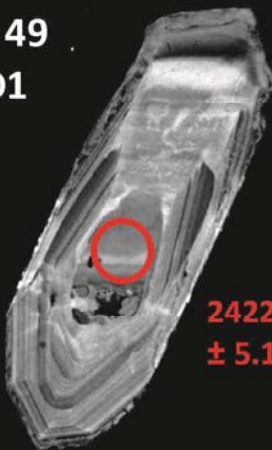

2422.3  
± 5.1 Ma

HV | curr | WD | vac mode | det | pressure | 50 μm  
10.00 kV | 0.22 nA | 16.5 mm | High vacuum | PMD | 1.64e-6 Torr | SK10-49o

Sample 49  
zircon D2

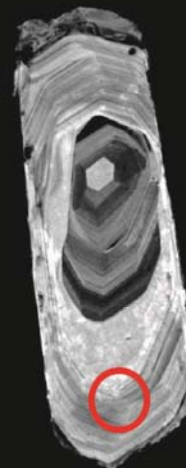

1818.5  
± 4.5 Ma

HV | curr | WD | vac mode | det | pressure | 50 μm  
10.00 kV | 0.22 nA | 16.5 mm | High vacuum | PMD | 1.55e-6 Torr | SK10-49o

Sample 58  
zircon B2

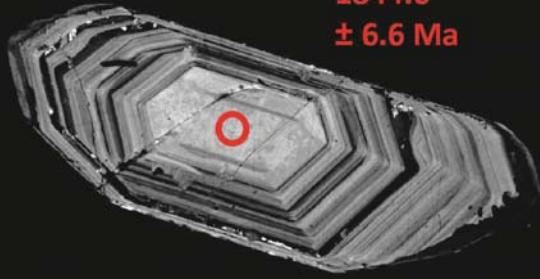

1844.6  
± 6.6 Ma

HV | curr | WD | vac mode | det | pressure | 100 μm  
10.00 kV | 0.22 nA | 16.7 mm | High vacuum | PMD | 3.44e-6 Torr | SK10-58

Sample 58  
zircon B3

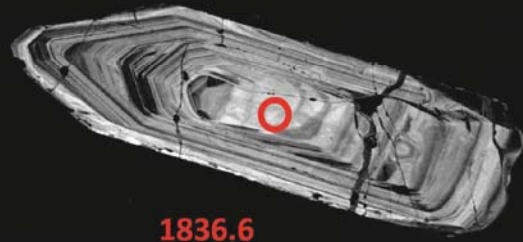

1836.6  
± 4.5 Ma

HV | curr | WD | vac mode | det | pressure | 100 μm  
10.00 kV | 0.22 nA | 16.7 mm | High vacuum | PMD | 3.17e-6 Torr | SK10-58

Sample 58  
zircon C3

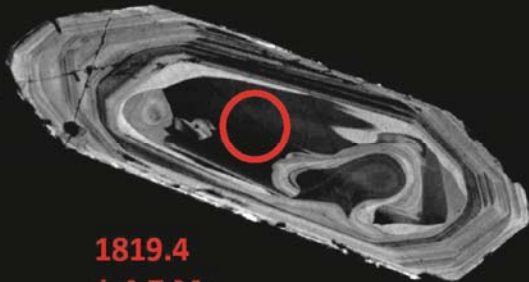

1819.4  
± 4.7 Ma

HV | curr | WD | vac mode | det | pressure | 50 μm  
10.00 kV | 0.22 nA | 16.7 mm | High vacuum | PMD | 2.91e-6 Torr | SK10-58

Sample 58  
zircon E1

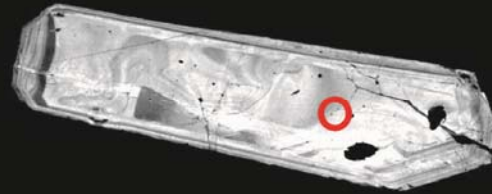

1828  
± 4.7 Ma

HV | curr | WD | vac mode | det | pressure | 100 μm  
10.00 kV | 0.22 nA | 16.7 mm | High vacuum | PMD | 2.16e-6 Torr | SK10-58

Sample 58  
zircon E2

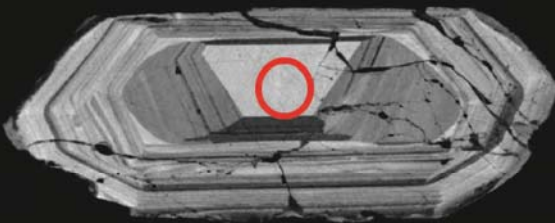

1823  
± 4.5 Ma

HV | curr | WD | vac mode | det | pressure | 50 μm  
10.00 kV | 0.22 nA | 16.7 mm | High vacuum | PMD | 2.16e-6 Torr | SK10-58

Sample 58  
zircon E3

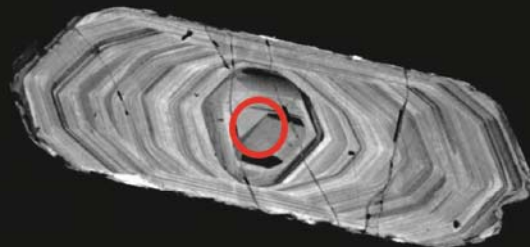

1860.7  
± 4.5 Ma

HV | curr | WD | vac mode | det | pressure | 50 μm  
10.00 kV | 0.22 nA | 16.7 mm | High vacuum | PMD | 2.33e-6 Torr | SK10-58



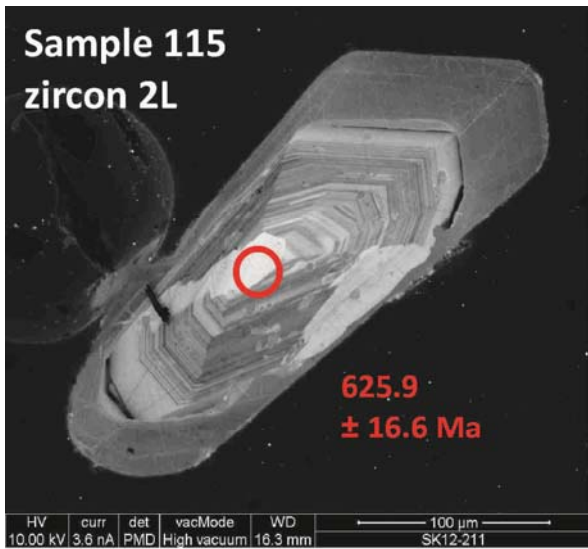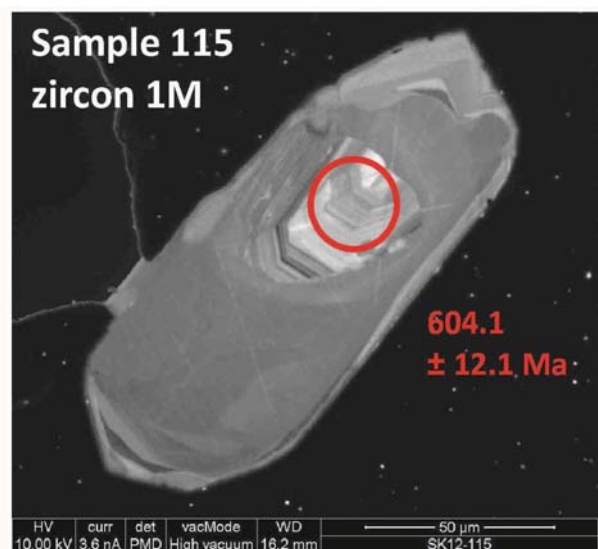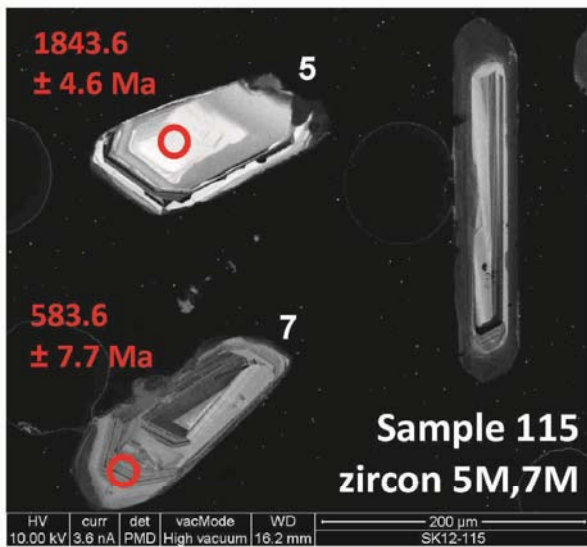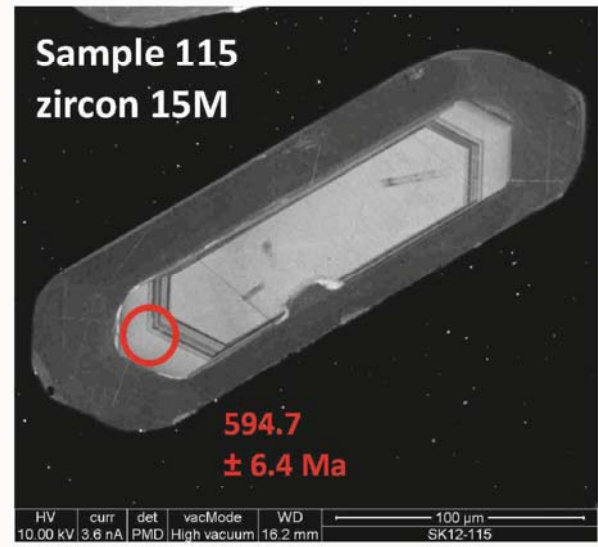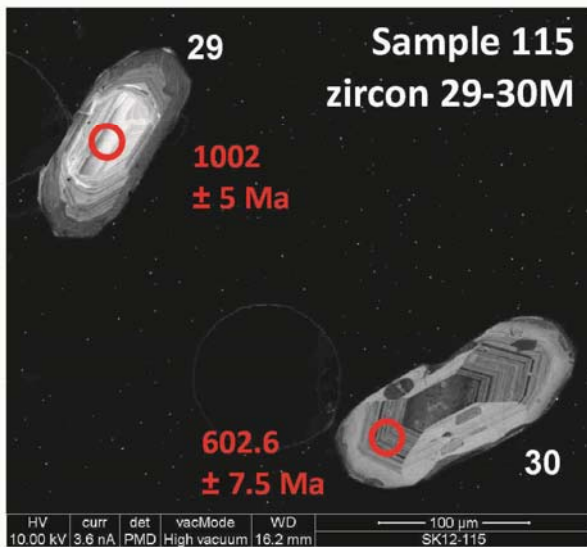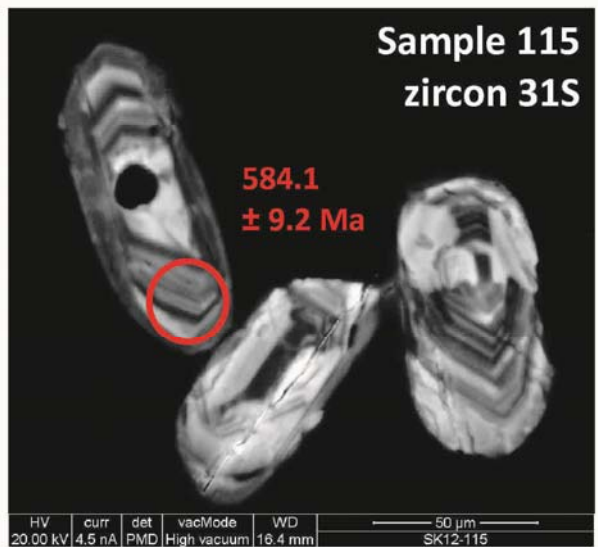

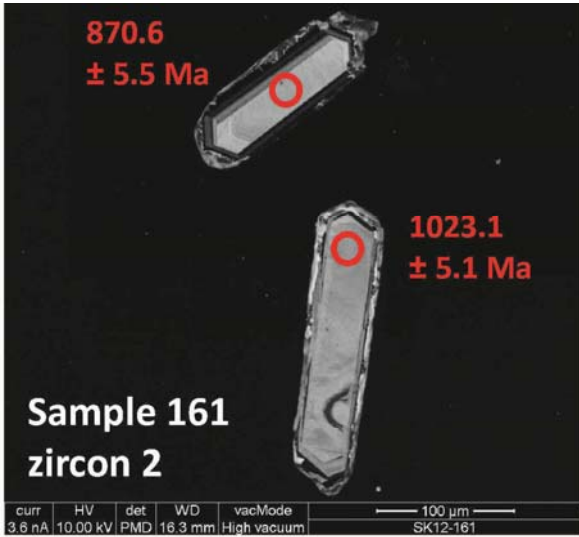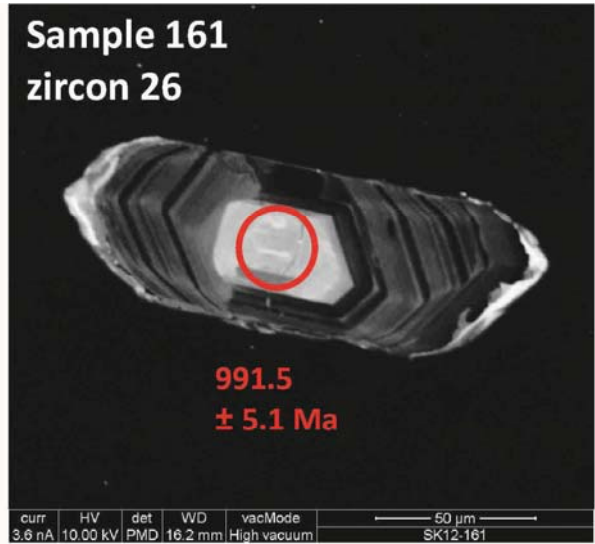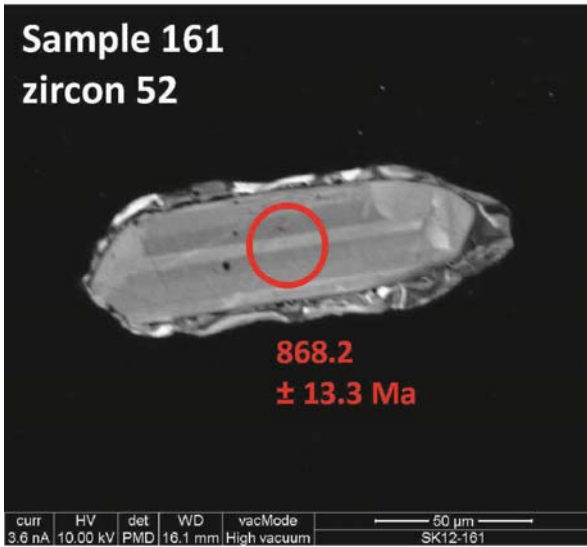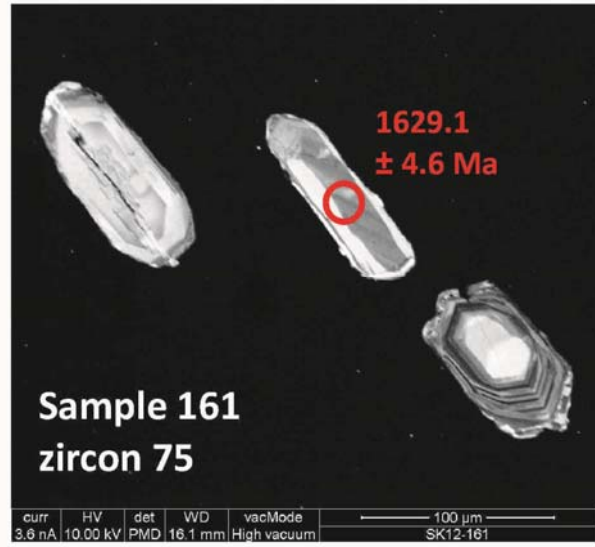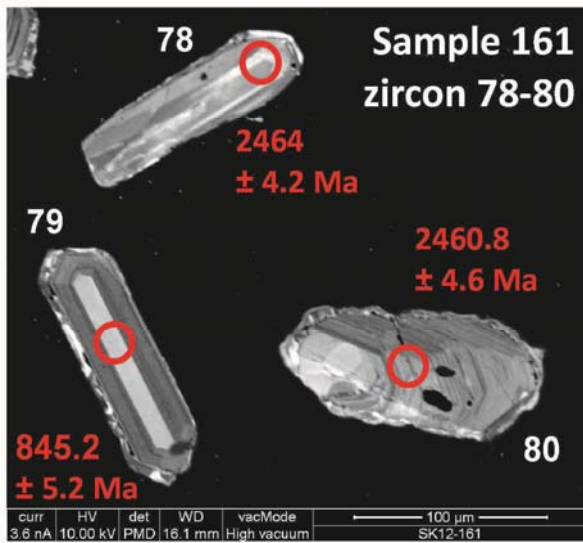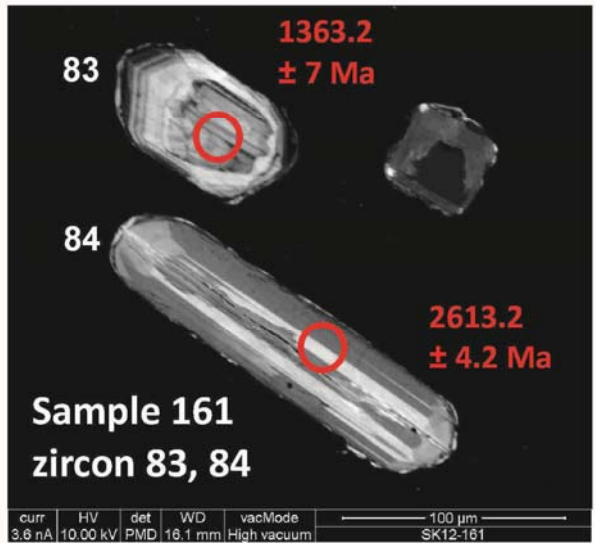



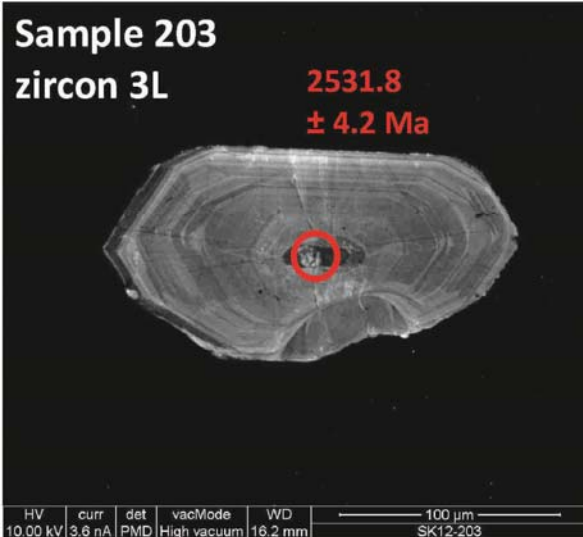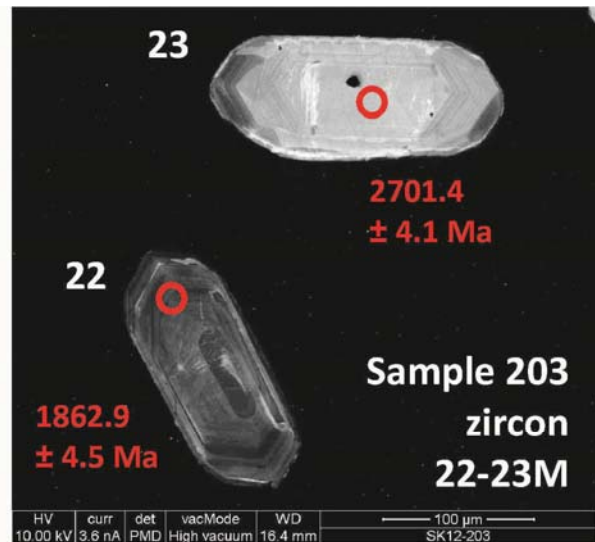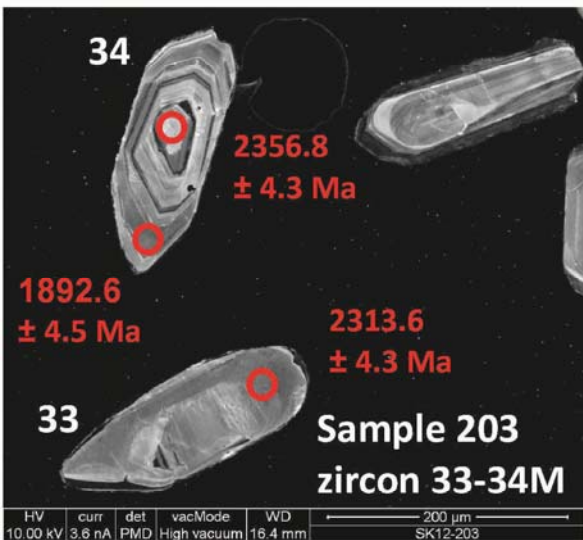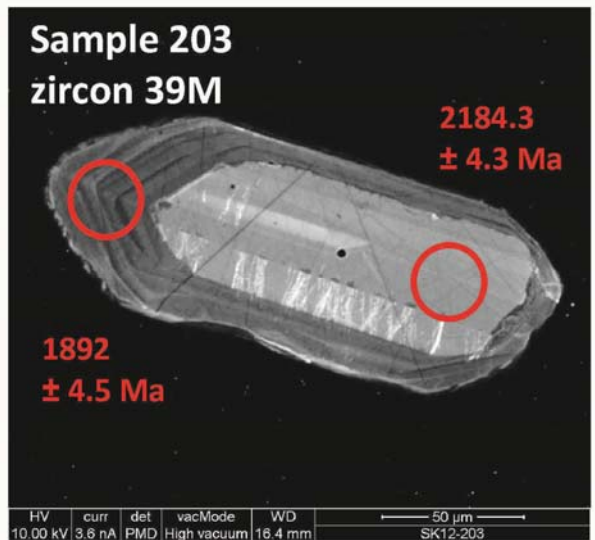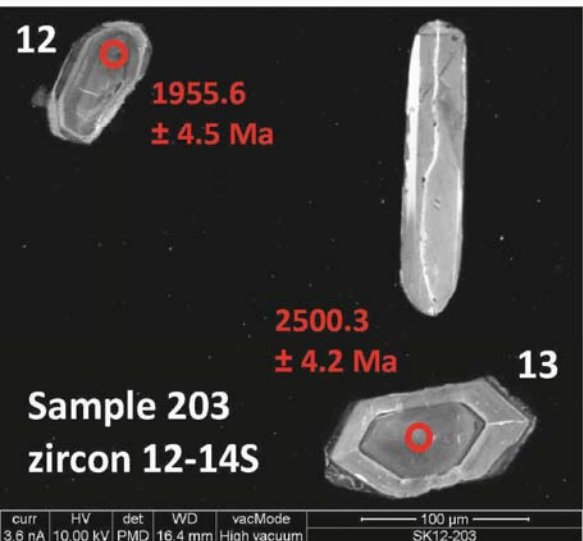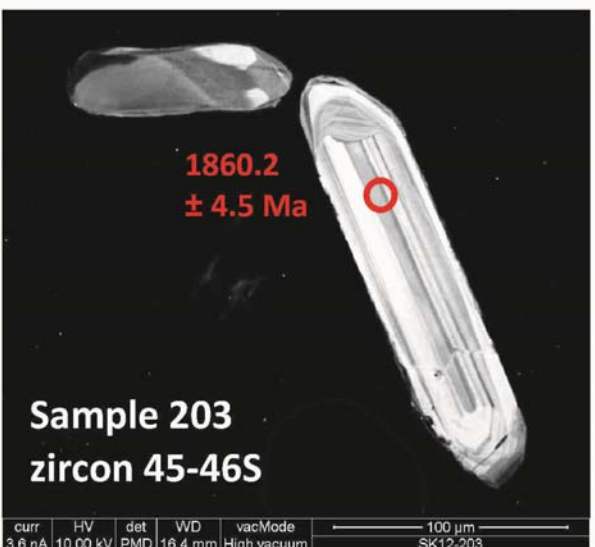

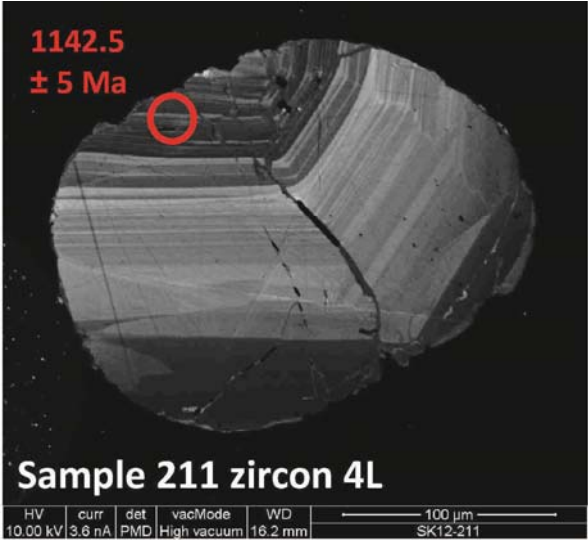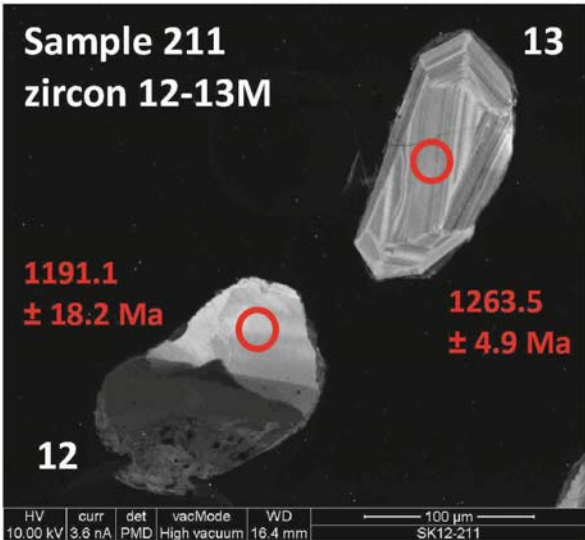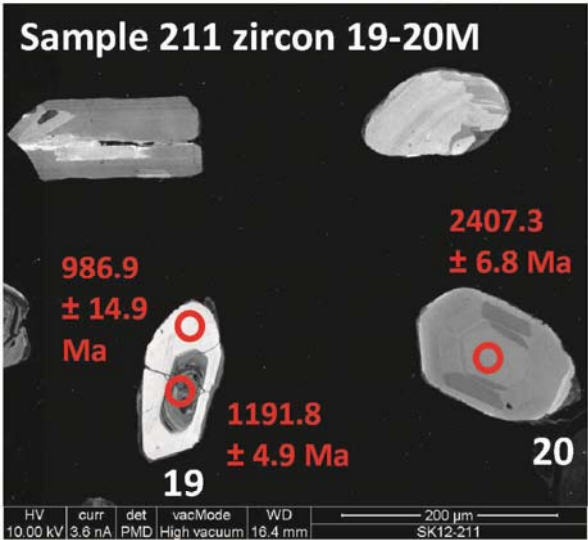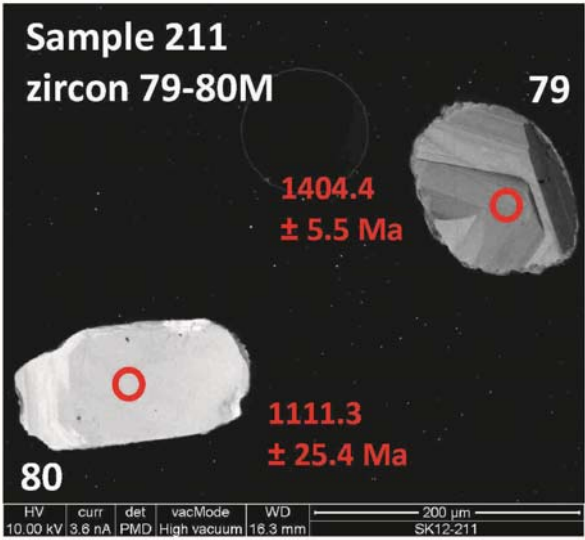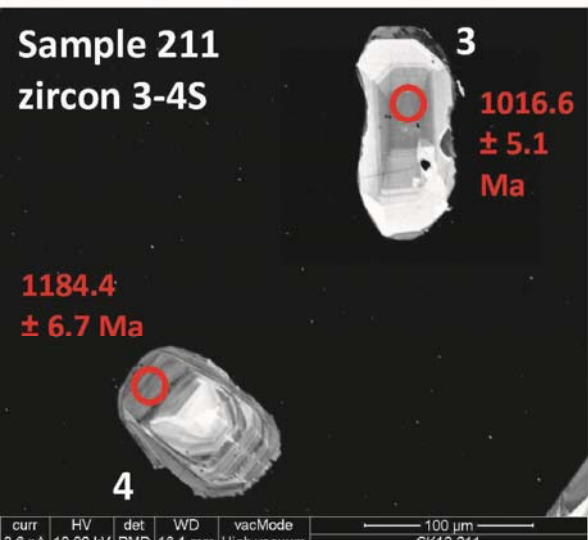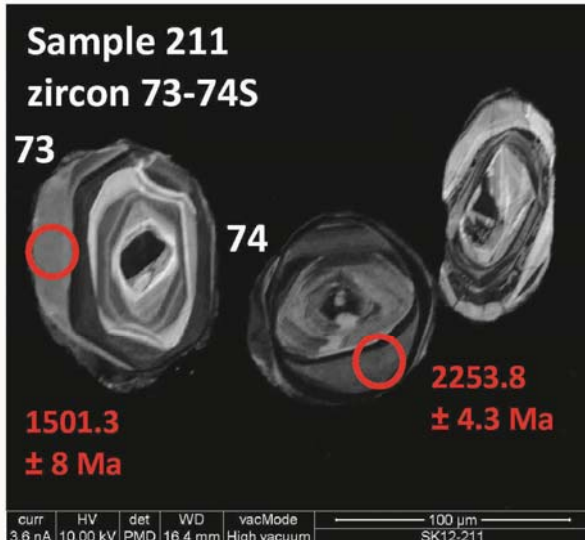



Sample 233  
zircon 8M

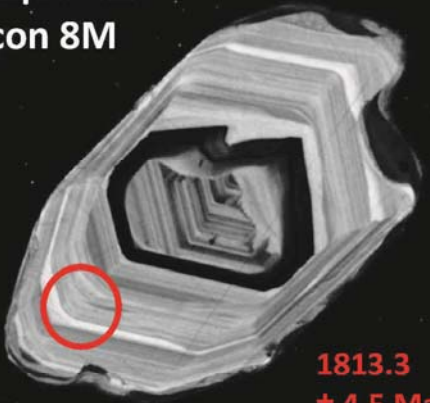

1813.3  
± 4.5 Ma

HV 10.00 kV curr 3.6 nA det PMD vacMode High vacuum WD 16.6 mm 50 µm SK12-233

Sample 233  
zircon 9M

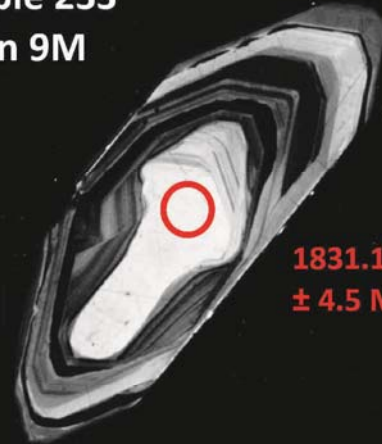

1831.1  
± 4.5 Ma

HV 10.00 kV curr 3.6 nA det PMD vacMode High vacuum WD 16.6 mm 100 µm SK12-233

Sample 233  
zircon 14M

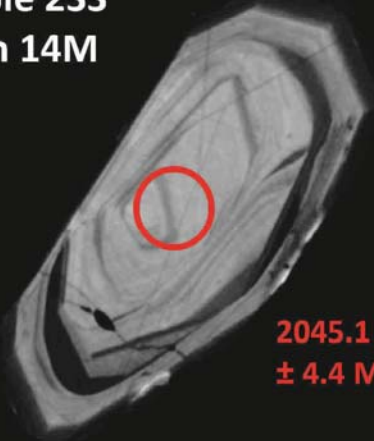

2045.1  
± 4.4 Ma

HV 10.00 kV curr 3.6 nA det PMD vacMode High vacuum WD 16.6 mm 50 µm SK12-233

Sample 233  
zircon 1S

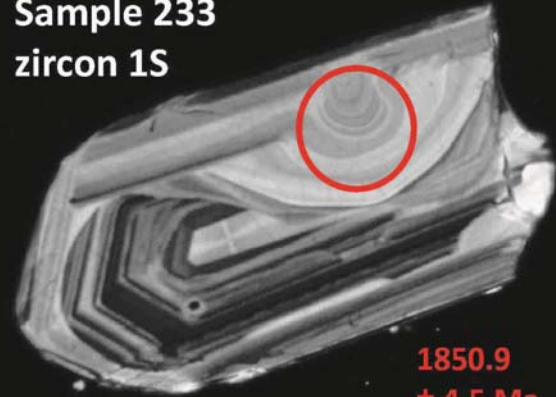

1850.9  
± 4.5 Ma

curr 3.6 nA HV 10.00 kV det PMD WD 16.3 mm vacMode High vacuum 50 µm SK12-233

Sample 233 zircon 5S

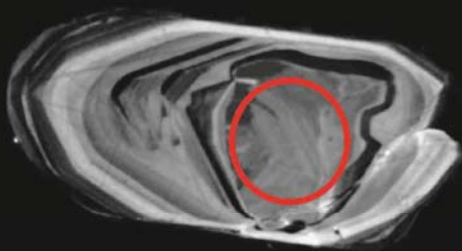

1837.9  
± 4.5 Ma

curr 3.6 nA HV 10.00 kV det PMD WD 16.3 mm vacMode High vacuum 50 µm SK12-233

Sample 233  
zircon 19-20S

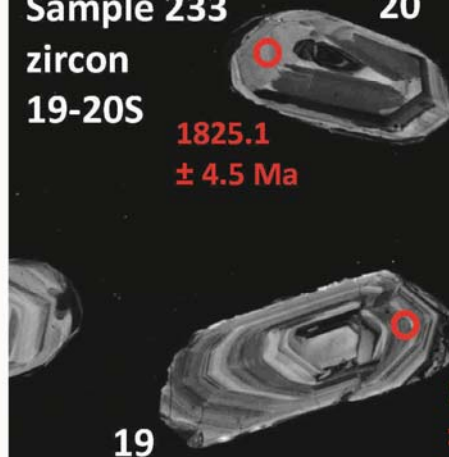

1825.1  
± 4.5 Ma

1817.2  
± 4.5 Ma

curr 3.6 nA HV 10.00 kV det PMD WD 16.3 mm vacMode High vacuum 100 µm SK12-233

Sample 245  
zircon 4L

2645.8  
± 4.1 Ma

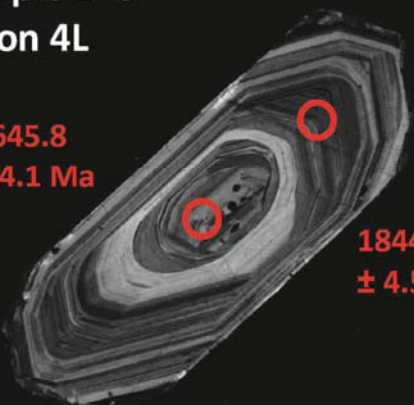

1844.9  
± 4.5 Ma

|          |        |     |             |         |          |
|----------|--------|-----|-------------|---------|----------|
| HV       | curr   | det | vacMode     | WD      | 100 µm   |
| 10.00 kV | 3.6 nA | PMD | High vacuum | 16.3 mm | SK12-245 |

Sample 245  
zircon 1M

1858.6  
± 4.5 Ma

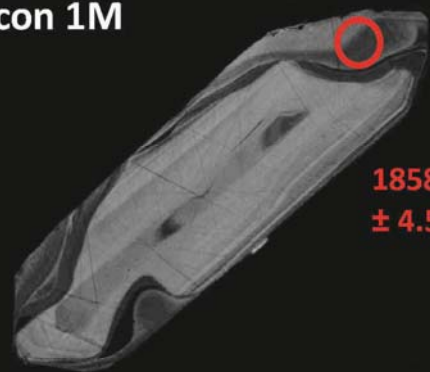

|          |        |     |             |         |          |
|----------|--------|-----|-------------|---------|----------|
| HV       | curr   | det | vacMode     | WD      | 100 µm   |
| 10.00 kV | 3.6 nA | PMD | High vacuum | 16.1 mm | SK12-245 |

1851.8  
± 4.5 Ma

Sample 245  
zircon 7M

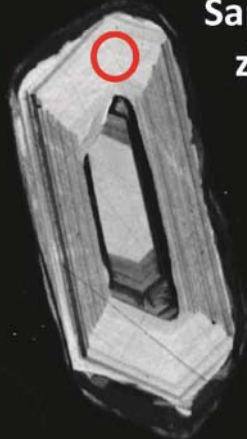

|          |        |     |             |         |          |
|----------|--------|-----|-------------|---------|----------|
| HV       | curr   | det | vacMode     | WD      | 50 µm    |
| 10.00 kV | 3.6 nA | PMD | High vacuum | 16.1 mm | SK12-245 |

21

22

23

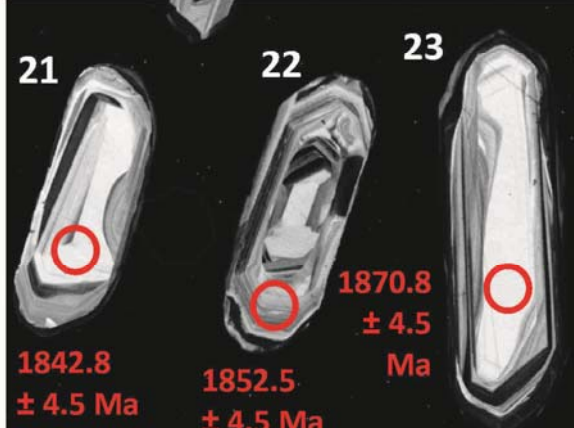

1842.8  
± 4.5 Ma

1852.5  
± 4.5 Ma

1870.8  
± 4.5  
Ma

Sample 245 zircon 21-23M

|          |        |     |             |         |          |
|----------|--------|-----|-------------|---------|----------|
| HV       | curr   | det | vacMode     | WD      | 100 µm   |
| 10.00 kV | 3.6 nA | PMD | High vacuum | 16.1 mm | SK12-245 |

Sample 245 zircon 38-39M

39

1865.5  
± 4.5 Ma

38

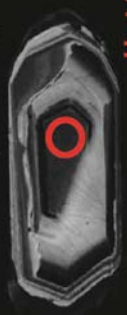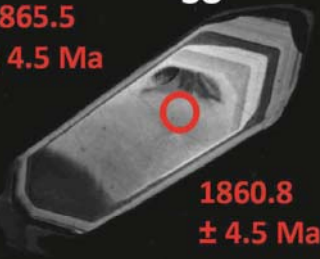

1860.8  
± 4.5 Ma

|          |        |     |             |         |          |
|----------|--------|-----|-------------|---------|----------|
| HV       | curr   | det | vacMode     | WD      | 100 µm   |
| 10.00 kV | 3.6 nA | PMD | High vacuum | 16.1 mm | SK12-245 |

Sample 245  
zircon 19S

1902.6  
± 17 Ma

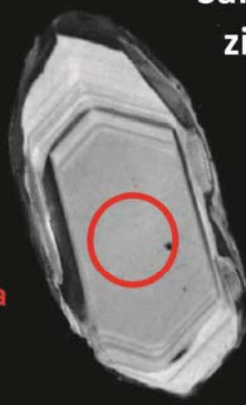

|        |          |     |         |             |          |
|--------|----------|-----|---------|-------------|----------|
| curr   | HV       | det | WD      | vacMode     | 50 µm    |
| 3.6 nA | 10.00 kV | PMD | 16.3 mm | High vacuum | SK12-245 |



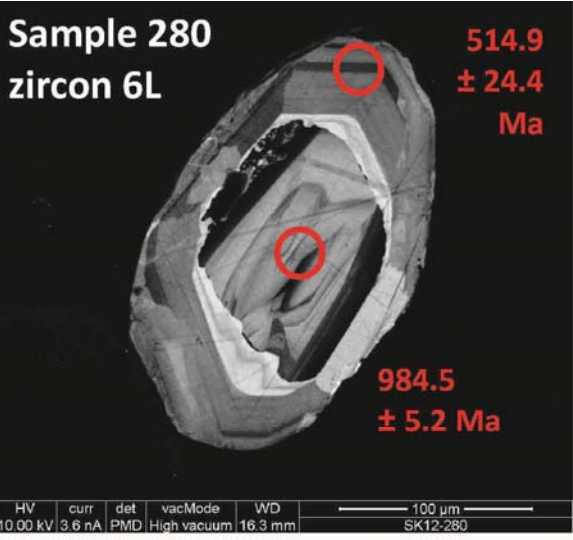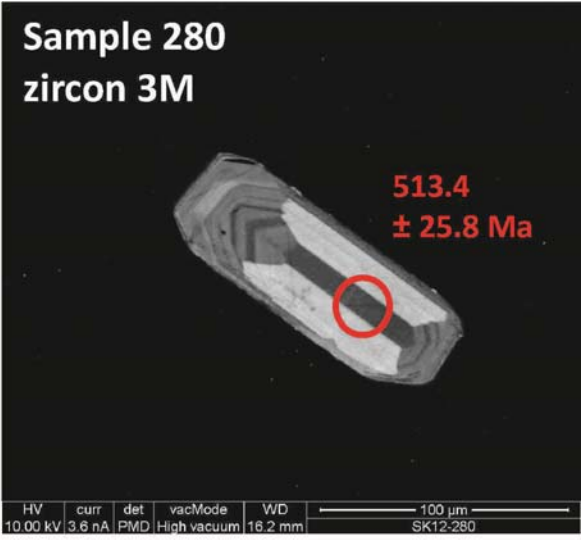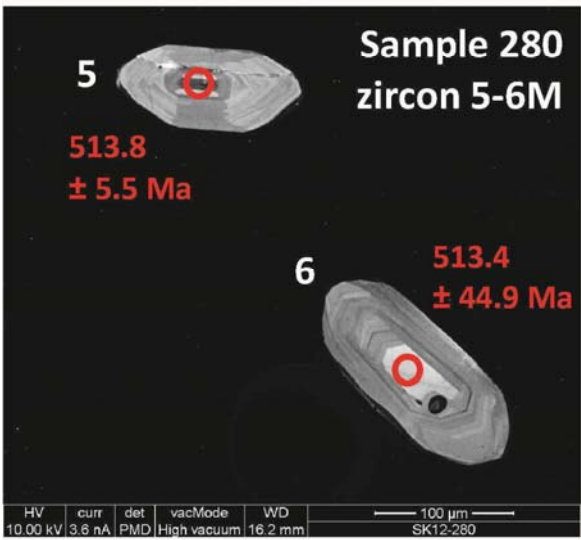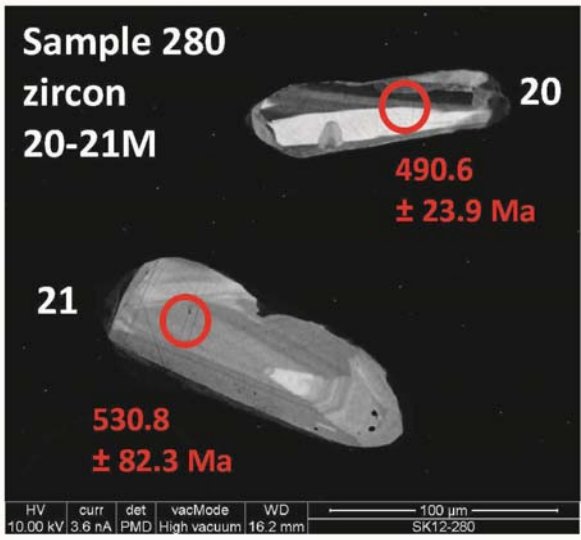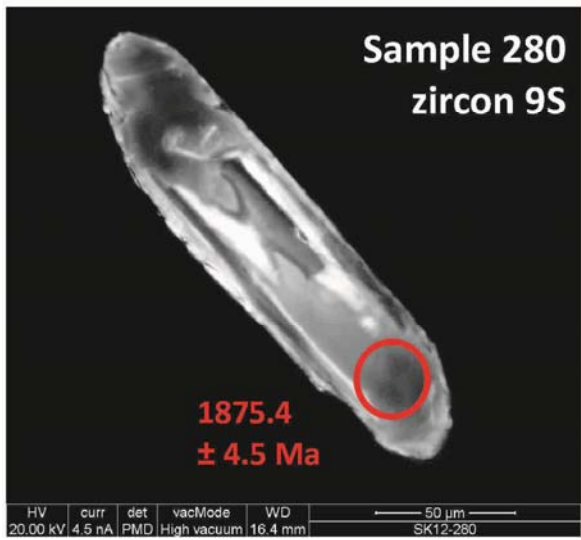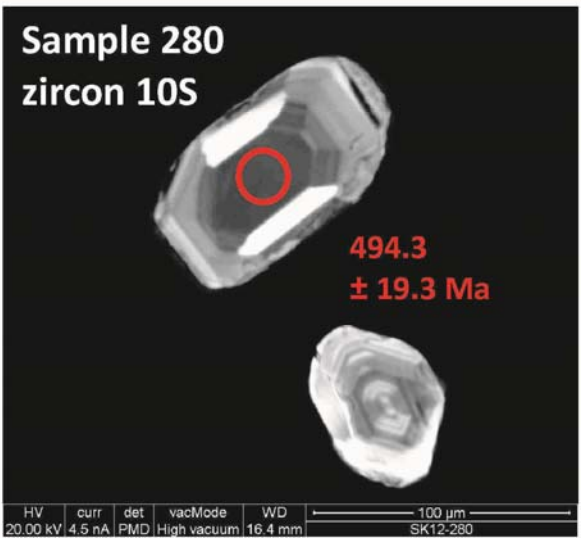

Sample 292  
zircon 4L

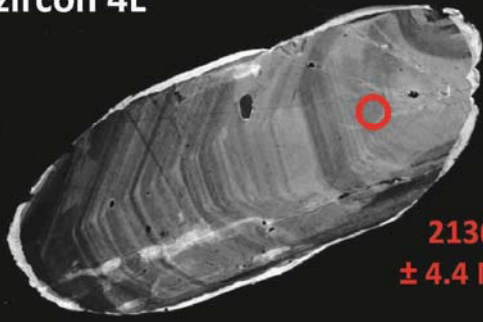

2136.9  
± 4.4 Ma

HV 10.00 kV | curr 3.6 nA | det PMD | vacMode High vacuum | WD 16.2 mm | 100 μm | SK12-292

Sample 292  
zircon 2M

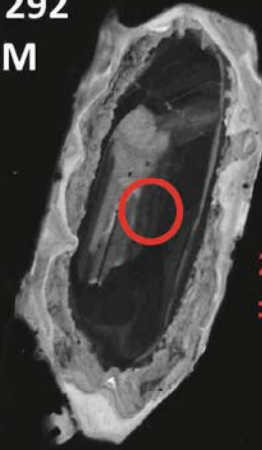

2407.8  
± 4.2 Ma

HV 10.00 kV | curr 3.6 nA | det PMD | vacMode High vacuum | WD 16.6 mm | 100 μm | SK12-292

Sample 292  
zircon 9M

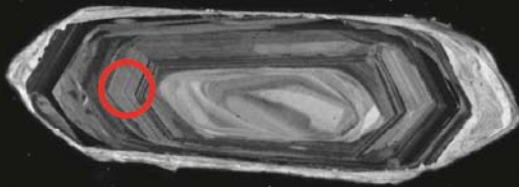

3178.3  
± 3.9 Ma

HV 10.00 kV | curr 3.6 nA | det PMD | vacMode High vacuum | WD 16.6 mm | 100 μm | SK12-292

Sample 292  
zircon 10-11M

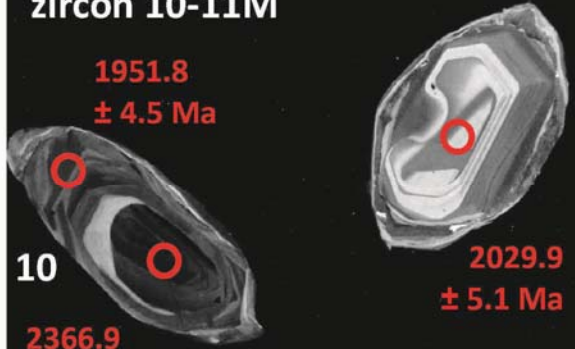

1951.8  
± 4.5 Ma

10

2366.9  
± 4.3 Ma

11  
2029.9  
± 5.1 Ma

HV 10.00 kV | curr 3.6 nA | det PMD | vacMode High vacuum | WD 16.6 mm | 100 μm | SK12-292

26

1936.4  
± 4.5 Ma

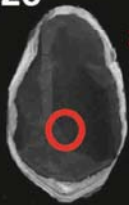

27

3695.3  
± 4.6 Ma

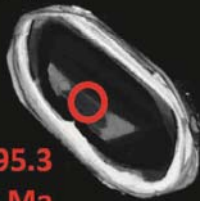

28

Sample 292  
zircon 26-28S

1869.2 ± 4.5 Ma

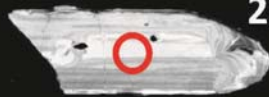

curr 3.6 nA | HV 10.00 kV | det PMD | WD 16.5 mm | vacMode High vacuum | 100 μm | SK12-292

Sample 292  
zircon 70S

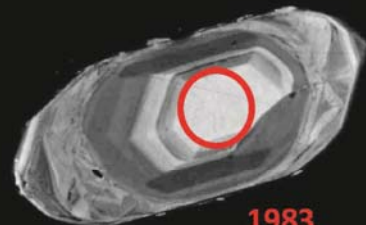

1983  
± 5.4 Ma

curr 3.6 nA | HV 10.00 kV | det PMD | WD 16.5 mm | vacMode High vacuum | 50 μm | SK12-292



#### **S4. Full analytical conditions- Nu Plasma LA-MC-ICP-MS**

##### **U-Pb LA-MC-ICP-MS (zircon) isotope analyses at NIGL (BGS, Keyworth, UK)**

Detrital zircon and orthogneiss samples were analysed at the NERC Isotope Geosciences Laboratory (NIGL) using a Nu Instruments, Nu Plasma HR multi-collector inductively coupled plasma mass spectrometer (MC-ICP-MS) equipped with a multi-ion-counting array. Instrumental parameters are shown in Table 1 and methodology is detailed in Thomas et al. (2010).

Rock samples were crushed using a jaw crusher and disk mill. Milled material was then sieved and material <355µm collected. The heavy material was separated from the light material using the Roger's table, which was then separated further using a Frantz magnetic separator. Subsequently the non-magnetic fraction was further separated using diodomethane heavy liquid separation. Finally zircons of varying sizes were picked from this heavy-non-magnetic fraction in ethanol. Samples were mounted in 25mm epoxy resin discs, polished to reveal an equatorial section of the mineral grains and imaged using a cathodoluminescence capability on the scanning electron microscope (SEM) FEI Quanta 600 ESEM, at the British Geological Survey, Keyworth.

Ablation was conducted using either a UP193FX (193nm) excimer or UP193SS (193nm) Nd:YAG laser ablation system (New Wave Research, UK) and an in-house designed low volume 'zircon ablation cell' (Horstwood et al. 2003) based on the design principles of Bleiner and Gunther (2001). Ablated sample material was transported from the laser cell into the MC-ICP-MS using a continuous flow of 0.8l/min of He gas. Operational parameters of the laser are detailed in Table 1.

The laser was fired using a repetition rate of 6Hz and a 25µm static spot size and a laser fluence of 1-2 J.cm<sup>-2</sup> or 3-4 J.cm<sup>-2</sup> due to core and rim uranium concentration variations and disparities between detrital grains. Typical ablation pit depths for fluence of 2-3 J.cm<sup>-2</sup> are of the order of 16µm as measured previously using an SEM.

Reference materials were analysed at regular intervals throughout the analytical session (typically 2-3 of each between each ablation run of unknowns). The internationally recognised 91500 zircon (Wiedenbeck et al. 1995) and GJ-1 (Jackson et al. 2004) were used as primary reference materials depending on the instrumental sensitivity and fluence used at the time. Plešovice (Sláma et al. 2008), GJ-1 and/or 91500 were variously used as appropriate secondary reference materials in order to validate the data for each day. As the data were collected in 21 separate analytical sessions spanning over a year, it has been possible to calculate a long-term reproducibility of ~2.5% (2SD) for Plešovice over the whole analytical period (14/03/2011- 28/06/2012) (Figure 1).

Pb-U uncertainties in the data tables are propagated for the reproducibility of the primary reference material, whilst uncertainties for Pb-Pb are propagated according to the <sup>207</sup>Pb intensity of the measurement but limited at a minimum of 0.25% (1σ) to allow for reproducibility of the multi-ion counting measurement. All data were processed using an in-house spreadsheet calculation routine. The data are presented as Wetherill plots or <sup>206</sup>Pb/<sup>238</sup>U age relative probability plots generated on all data <5% discordant using Isoplot 4.15 (Ludwig 2003). Due to slight discordance in some of the sample populations, ages are calculated as average <sup>207</sup>Pb/<sup>206</sup>Pb ages with uncertainties as 2SD. The MSWD of the population is quoted and generally reflects excess scatter in the Pb/Pb data. Causes of this are assumed to be geological and poorly resolved, hence the preference for uncertainties at the level of 2SD.

| <b>Table 1: Laboratory &amp; Sample Preparation (as per recommended reporting guidelines of CIRDLES <a href="http://cirdles.org">http://cirdles.org</a>)</b> |                                                                                                |
|--------------------------------------------------------------------------------------------------------------------------------------------------------------|------------------------------------------------------------------------------------------------|
| Laboratory name                                                                                                                                              | NERC Isotope Geosciences Laboratory (NIGL), United Kingdom                                     |
| Sample type/mineral                                                                                                                                          | Detrital zircons/ orthogneisses                                                                |
| Sample preparation                                                                                                                                           | Conventional mineral separation, 1 inch resin mount, 1um polish to finish                      |
| Imaging                                                                                                                                                      | CL, FEI Quanta 600 ESEM, 10nA, 15mm working distance                                           |
| <b>Laser ablation system</b>                                                                                                                                 |                                                                                                |
| Make, Model & type                                                                                                                                           | UP193FX (193nm) Excimer / UP193SS (193nm) Nd:YAG laser ablation system (New Wave Research, UK) |
| Ablation cell & volume                                                                                                                                       | In-house low volume ablation cell, volume c.3cm <sup>3</sup>                                   |
| Laser wavelength (nm)                                                                                                                                        | 193nm                                                                                          |
| Pulse width (ns)                                                                                                                                             | 3-4ns                                                                                          |
| Fluence (J.cm <sup>-2</sup> )                                                                                                                                | 1-3 J.cm <sup>-2</sup>                                                                         |
| Repetition rate (Hz)                                                                                                                                         | 5Hz                                                                                            |
| Spot size (μm)                                                                                                                                               | 25μm                                                                                           |
| Sampling mode / pattern                                                                                                                                      | Single spots                                                                                   |
| Carrier gas                                                                                                                                                  | 100% He, Ar make-up gas combined using a Y-connector 50% along sample line.                    |
| Ablation duration (secs)                                                                                                                                     | 30secs                                                                                         |
| Cell carrier gas flow (l/min)                                                                                                                                | 0.8l/min                                                                                       |
| <b>ICP-MS Instrument</b>                                                                                                                                     |                                                                                                |
| Make, Model & type                                                                                                                                           | Nu Instruments, Nu Plasma HR, MC-ICP-MS                                                        |
| Sample introduction                                                                                                                                          | Ablation aerosol combined with co-aspiration of desolvated TI- <sup>235</sup> U tracer         |



|                                                    |                                                                                                                                                                                                                      |
|----------------------------------------------------|----------------------------------------------------------------------------------------------------------------------------------------------------------------------------------------------------------------------|
| RF power (W)                                       | 1300W                                                                                                                                                                                                                |
| Make-up gas flow (l/min)                           | 0.7l/min Ar                                                                                                                                                                                                          |
| Detection system                                   | mixed Faraday-multiple ion counting array                                                                                                                                                                            |
| Masses measured                                    | 202-207, 235, 238                                                                                                                                                                                                    |
| Integration time per peak (ms)                     | 200ms                                                                                                                                                                                                                |
| Total integration time per data point (secs)       | 1 sec                                                                                                                                                                                                                |
| Detection Efficiency (% , element)                 | 0.4% U                                                                                                                                                                                                               |
| IC Dead time (ns)                                  | 6, 9 & 7ns IC0, IC1 & IC2 resp.                                                                                                                                                                                      |
| <b>Data Processing</b>                             |                                                                                                                                                                                                                      |
| Gas blank                                          | 30 second on-peak zero subtracted                                                                                                                                                                                    |
| Calibration strategy                               | 91500 or GJ-1 used as primary reference material, Plesovice & GJ1 or 91500 used as secondaries.                                                                                                                      |
| Long-term reproducibility                          | 2.5% (2SD) on Plesovice over a one year period                                                                                                                                                                       |
| Reference Material info                            | 91500 (Wiedenbeck et al 1995)<br>Plesovice (Slama et al 2008)<br>GJ1 $^{206}\text{Pb}/^{238}\text{U}$ 602.3 $\pm$ 1Ma, $^{207}\text{Pb}/^{206}\text{Pb}$ 609.2 $\pm$ 0.7Ma (in-house TIMS, unpublished)              |
| Data processing package used / Correction for LIEF | Nu Instruments TRA software used to output data using average LIEF correction, In-house spreadsheet data processing used to reduce data and propagate uncertainties using the decay constants of Jaffey et al. 1971. |
| Mass discrimination                                | $^{207}\text{Pb}/^{206}\text{Pb}$ and $^{206}\text{Pb}/^{238}\text{U}$ normalised to reference material                                                                                                              |
| Common-Pb correction, composition and uncertainty  | No common-Pb correction applied                                                                                                                                                                                      |
| Uncertainty level &                                | Ages are quoted at 2sigma absolute, propagation is by quadratic                                                                                                                                                      |

|                              |                                                                                                                                                                                                                                                                                                      |
|------------------------------|------------------------------------------------------------------------------------------------------------------------------------------------------------------------------------------------------------------------------------------------------------------------------------------------------|
| propagation                  | addition. Reproducibility and age uncertainty of reference material and common-Pb composition uncertainty are propagated.                                                                                                                                                                            |
| Quality control / Validation | <p>Plesovice – Weighted average <math>^{206}\text{Pb}/^{238}\text{U}</math> age = <math>335 \pm 1.5</math> (2SD, MSWD = 0.96) Figure 1</p> <p>GJ-1 – Weighted average <math>^{206}\text{Pb}/^{238}\text{U}</math> age = <math>603.47 \pm 0.94</math> (95% confidence limit, MSWD = 1.4) Figure 2</p> |



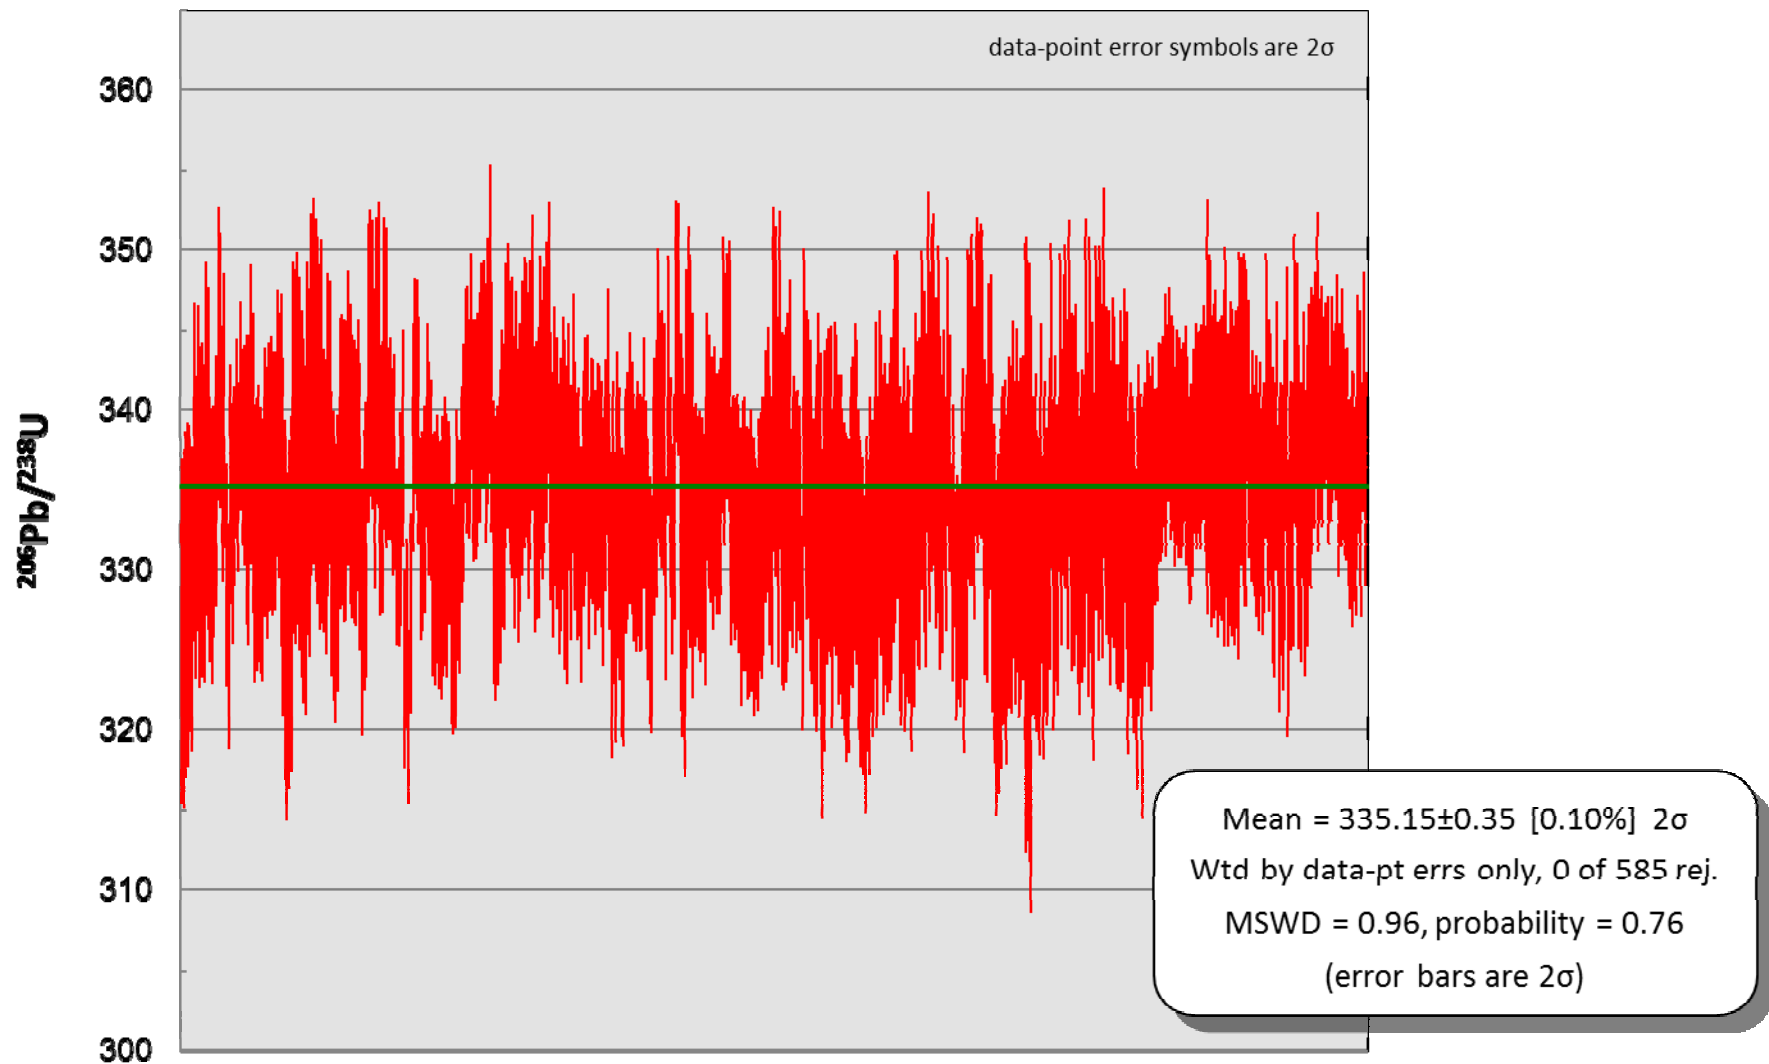

Figure 1: 2.5% (2SD) Long-term reproducibility of Plešovice (Sláma et al., 2008)  $^{206}\text{Pb}/^{238}\text{U}$  age determined as validation over the analytical period 14.03.2011- 28.06.2012.

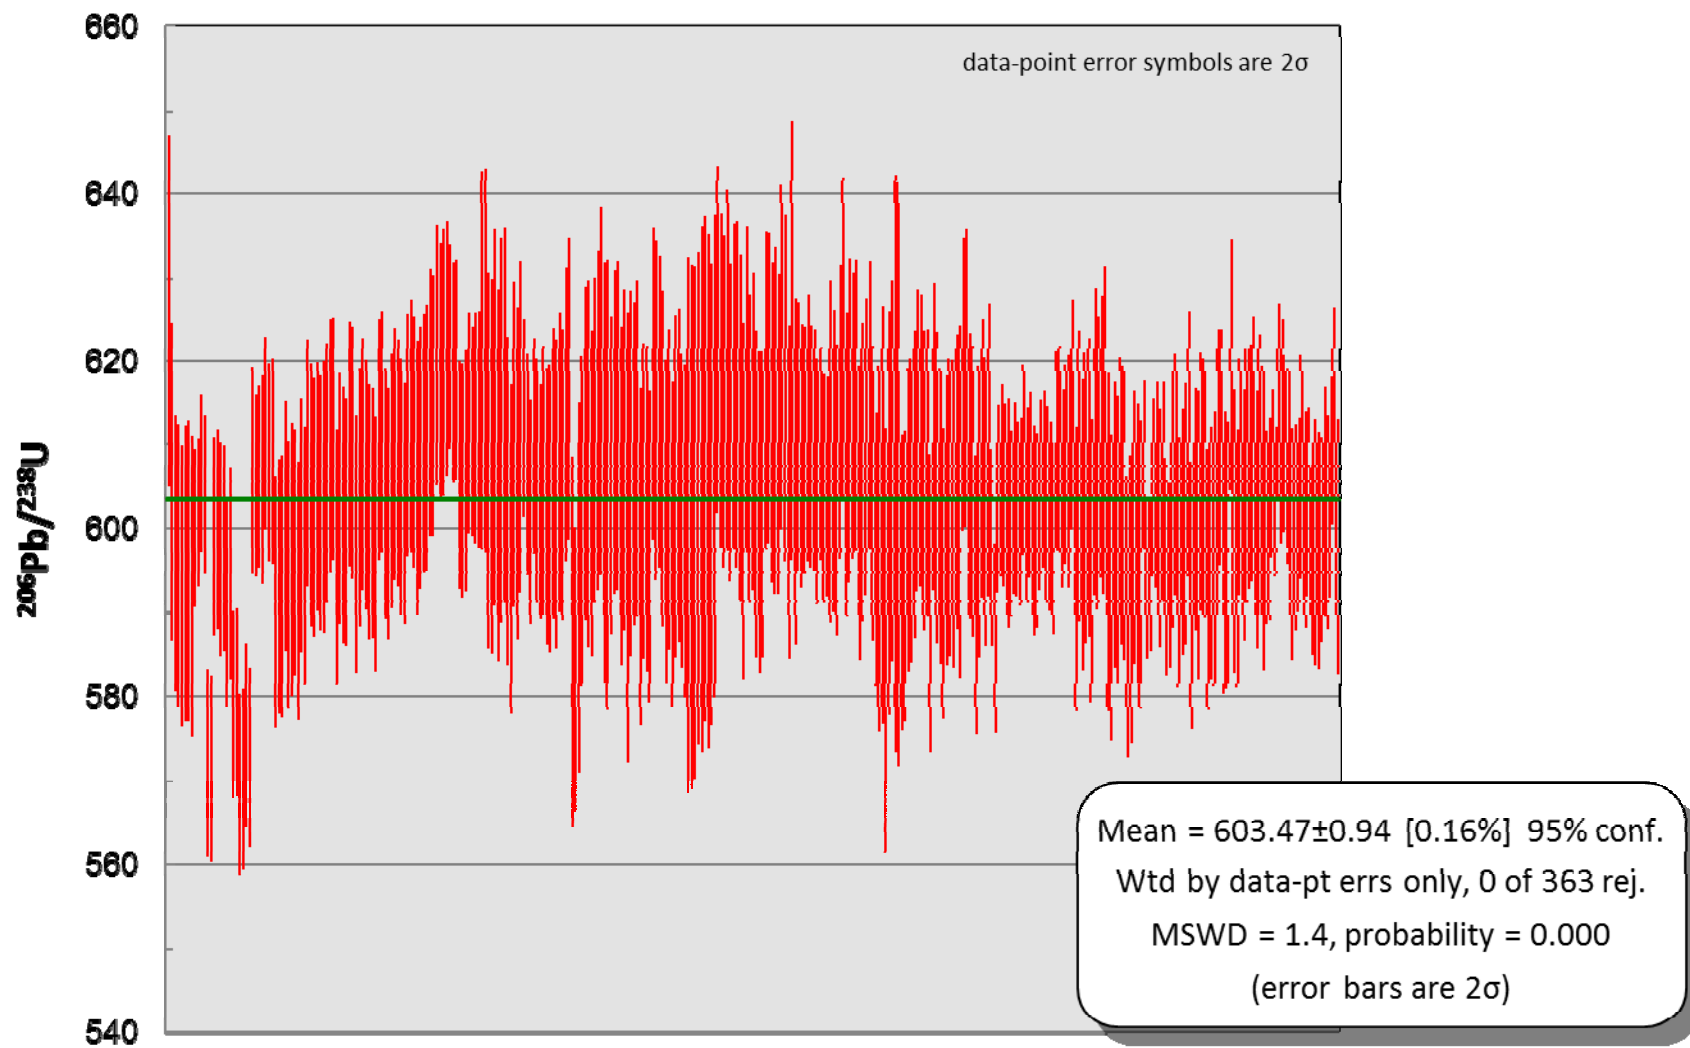

Figure 2: Long-term reproducibility of GJ-1 (Jackson et al., 2004)  $^{206}\text{Pb}/^{238}\text{U}$  age determined as validation over the analytical period 14.03.2011-28.06.2012



### **S5. Full analytical conditions- AttoM LA-ICP-MS**

Some zircons were analysed for U-Th-Pb geochronology using a Nu Instruments Attom HR single-collector inductively coupled plasma mass spectrometer (HR-ICP-MS). Laser ablation was performed using the equipment stated before. The ablation parameters were a 25µm static spot, a repetition rate of 5Hz, a fluence of 1.5 to 2.5 J/cm<sup>2</sup>, a 15 second washout period between analyses, and a 30 second ablation time. The instrument was tuned to give ThO of <0.6%, and UO of <0.4%. Data processing used the time-resolved function on the Nu Instruments' software, an in-house Excel spreadsheet for data reduction and uncertainty propagation, and Isoplot for data presentation (Ludwig, 2003). All data are plotted at the 2σ confidence interval. Methodology followed that described in Thomas et al . (2013).

|                                            |                                                                             |
|--------------------------------------------|-----------------------------------------------------------------------------|
| <b>Laboratory &amp; Sample Preparation</b> |                                                                             |
| Laboratory name                            | NERC Isotope Geosciences Laboratory                                         |
| Sample type/mineral                        | Zircon                                                                      |
| Sample preparation                         | Conventional mineral separation, 1 inch resin mount, 1/4µm polish to finish |
| Imaging                                    | Cathodoluminescence                                                         |
| <b>Laser ablation system</b>               |                                                                             |
| Make, Model & type                         | New Wave Research UP193FX                                                   |
| Ablation cell & volume                     | In-house low volume ablation cell, volume c.3cm <sup>3</sup>                |
| Laser wavelength (nm)                      | 193nm                                                                       |
| Pulse width (ns)                           | 3-4ns                                                                       |
| Fluence (J.cm <sup>-2</sup> )              | 1.5-2.5 J.cm <sup>-2</sup>                                                  |
| Repetition rate (Hz)                       | 5Hz                                                                         |
| Ablation duration (secs)                   | 30secs                                                                      |
| Ablation pit depth / ablation rate         | ~15µm pit depth, measured using an optical microscope                       |
| Spot size (µm)                             | 25µm                                                                        |
| Sampling mode / pattern                    | Static spot ablation                                                        |
| Carrier gas                                | 100% He, Ar make-up gas combined ca.50% along sample line.                  |
| Cell carrier gas flow (l/min)              | 0.8l/min                                                                    |
| <b>ICP-MS Instrument</b>                   |                                                                             |
| Make, Model & type                         | Nu Instruments Attom SC-SF-ICP-MS                                           |
| Sample introduction                        | Free air aspiration via desolvator                                          |
| RF power (W)                               | 1300W                                                                       |
| Make-up gas flow (l/min)                   | 0.8l/min Ar                                                                 |
| Detection system                           | Discrete dynode MassCom ion counter                                         |
| Masses measured                            | 202, 204, 206, 207, 208, 232, 235                                           |
| Integration time per peak                  | 200µs (202,204,206,208,232), 500µs (207,235)                                |
| Total integration time per reading (secs)  | 0.22 seconds                                                                |

|                                                       |                                                                                                                                                                                                                                                     |
|-------------------------------------------------------|-----------------------------------------------------------------------------------------------------------------------------------------------------------------------------------------------------------------------------------------------------|
| Detection Efficiency (%<br>(%, element)               | ~0.27% for Uranium                                                                                                                                                                                                                                  |
| IC Dead time (ns)                                     | 15ns                                                                                                                                                                                                                                                |
| <b>Data Processing</b>                                |                                                                                                                                                                                                                                                     |
| Gas blank                                             | 60 second on-peak zero subtracted                                                                                                                                                                                                                   |
| Calibration strategy                                  | 91500, GJ1 & Plesovice (zircon); One used as primary reference material for normalization, and others for validation.                                                                                                                               |
| Reference Material info                               | 91500 (1065 Ma; Wiedenbeck et al. 1995)<br>GJ1 ( $^{206}\text{Pb}/^{238}\text{U}$ 602.3 $\pm$ 1Ma, $^{207}\text{Pb}/^{206}\text{Pb}$ 609.2 $\pm$ 0.7Ma; in-house TIMS, – see also Jackson et al. 2004)<br>Plesovice (337.13 Ma; Sláma et al., 2008) |
| Data processing package used /<br>Correction for LIEF | Nu Instruments TRA acquisition software, in-house spreadsheet data processing                                                                                                                                                                       |
| Mass discrimination                                   | $^{207}\text{Pb}/^{206}\text{Pb}$ and $^{206}\text{Pb}/^{238}\text{U}$ normalised to reference material                                                                                                                                             |
| Common-Pb correction,<br>composition and uncertainty  | No common-Pb correction applied                                                                                                                                                                                                                     |
| Uncertainty level &<br>propagation                    | Ages in the data table are quoted at 2sigma absolute, propagation is by quadratic addition. Reproducibility of reference material is propagated.                                                                                                    |
| Quality control /<br>Validation                       | Plesovice – Weighted average $^{206}\text{Pb}/^{238}\text{U}$ age = 340 $\pm$ 2 (2SD, MSWD = 0.36) Figure 3<br><br>GJ-1 – Weighted average $^{206}\text{Pb}/^{238}\text{U}$ age = 601.5 $\pm$ 3.7 (2SD MSWD = 0.73) Figure 4                        |

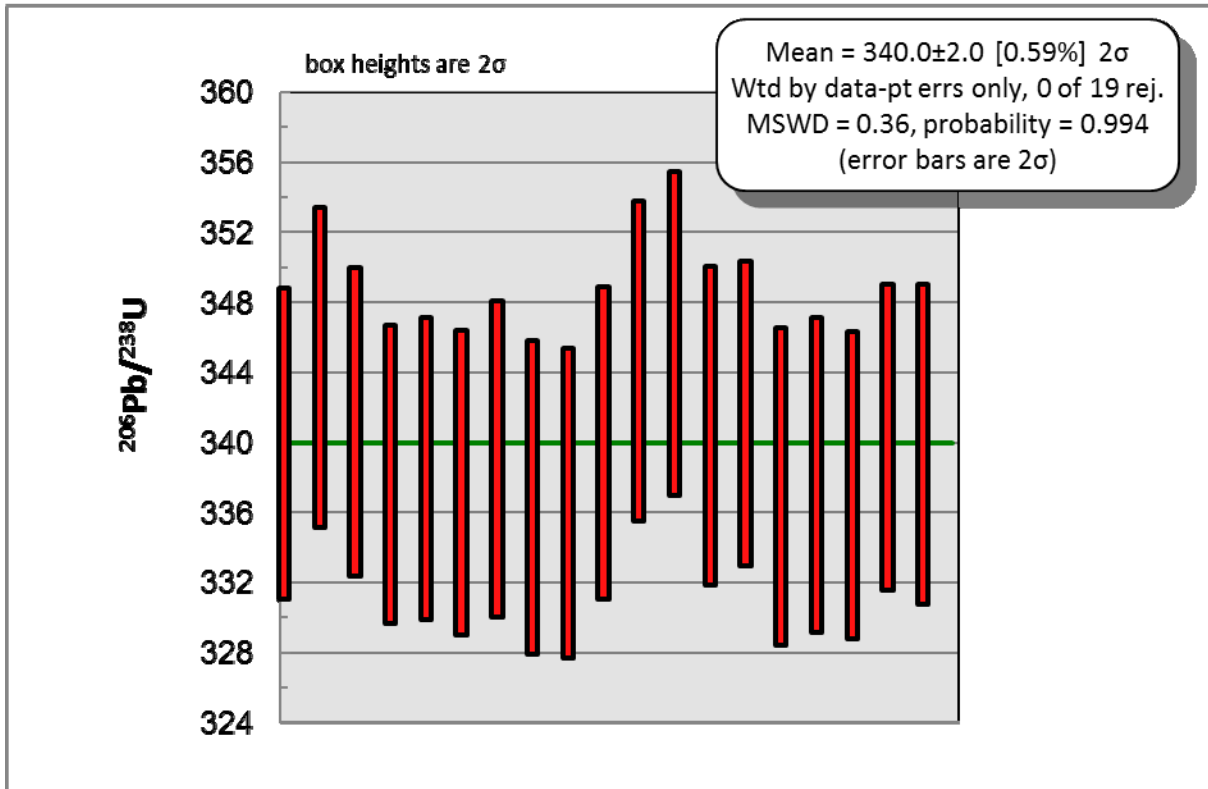

Figure 3: Reproducibility of Plešovice (Sláma et al., 2008)  $^{206}\text{Pb}/^{238}\text{U}$  age determined as validation over the analytical period for Attom SC-SF-ICP-MS

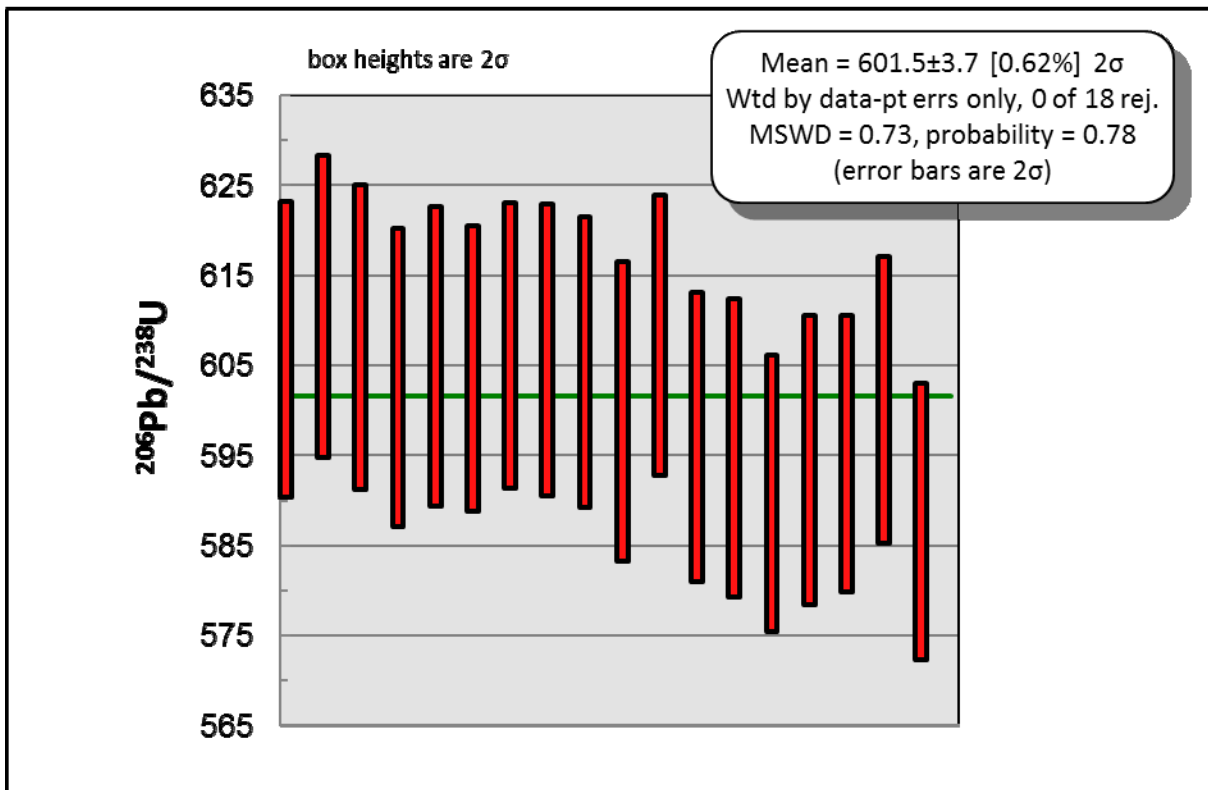

Figure 4: Reproducibility of GJ-1 (Jackson et al., 2004)  $^{206}\text{Pb}/^{238}\text{U}$  age determined as validation over the analytical period for Attom SC-SF-ICP-MS



## **S6. Nd analytical techniques**

### **Nd isotope analysis by thermal ionisation mass spectrometry (TIMS) at The Open University, UK.**

Whole rock Nd isotopic ratios were determined by thermal ionisation mass spectrometry (TIMS) using a ThermoScientific Triton at The Open University, UK.

Rock samples were crushed using a splitter, jaw crusher and agate ball mill. Approximately 100mg of powdered sample were dissolved and Nd isotopes were analysed using the following procedures (based on Pin and Zalduegui, 1997). Sm/Nd ratios were calculated from whole rock ICP-MS data. Total procedural blanks were spiked using ~5mg of SmNdLowDil spike.

Samples were digested using a standard HF - HNO<sub>3</sub> technique in a PFA Savillex<sup>®</sup> beaker. Prior to loading onto the ion exchange columns, samples were centrifuged to remove any residual graphite.

For Nd isotopic analyses, The REE elements were then separated from other elements, using a cation exchange resin (AG50w-x8). Neodymium was then separated from the other REE using Ln spec resin following the procedure outlined by Pin and Zalduegui (1997). Neodymium isotopes were analysed at the Open University using a ThermoFisher Triton thermal ionisation mass spectrometer (TIMS) in static mode. The sample was dissolved in dilute HCl and loaded onto one side of a double Re filament assemblage. After drying down, 1 µl of 0.01M H<sub>3</sub>PO<sub>4</sub> was added to the filament and dried and the filament was then flashed at 1.8 A for a second. For both sample and standards about 150 ng of Nd was loaded. Most runs yielded <sup>144</sup>Nd intensities of 4 V and 270 ratios of 8.394 seconds were collected for each analysis. Samples were typically run at 4550-5100V (Ionising filament) and 1500-2300V (Evaporation filament), with a pyrometer temperature of between 1630-1750°C. Analyses were corrected for instrumental mass fractionation using the exponential fractionation law assuming a <sup>146</sup>Nd/<sup>144</sup>Nd ratio of 0.7219 (O'Nions et al. 1977).

Repeat analyses of J&M standard gave <sup>143</sup>Nd/<sup>144</sup>Nd ratios of 0.511838±0.000009 (n=5, 2σ) which compared to a long-term reproducibility on this machine of J&M of 0.511834±0.000012 (n=17, 2σ). Analysis of La Jolla standard gave <sup>143</sup>Nd/<sup>144</sup>Nd ratios of 0.511864±0.00005 (2σ), which compared with a long term reproducibility on this machine of 0.511862±0.000011 (n=14, 2σ). Repeat analysis of the internationally recognised standard AGV-1 gave an average of 0.512417±0.000828 (n=4, 2σ), which is within error of the certified value (Raczek et al. 2003). Spiked total procedural blanks were analysed using the SEM on the TIMS. Total procedural blanks were negligible (between 27-98 pg).

<sup>147</sup>Sm/ <sup>144</sup>Nd ratios were calculated from elemental ratios obtained from quadrupole ICP-MS. Repeat analyses of international standard AGV-1 gave a Nd accuracy of within 8% of certified values (USGS) and a Sm of within 5% of certified values. Repeat analyses of AGV-1 gave a precision of 3% (relative standard deviation) for both Nd and Sm measurements.

Epsilon Nd was calculated at time 0 using present day CHUR values of 0.512638 (Hamilton et al. 1983). Errors on εNd value are shown as a function of the error on <sup>143</sup>Nd/<sup>144</sup>Nd measurement (from repeat analyses of J&M standard in epsilon units- 10000/0.511838\*0.000009=0.17) which gives an average of 0.2 in epsilon units.

## References

- Bleiner, D. & Günther, D. 2001. Theoretical description and experimental observation of aerosol transport processes in laser ablation inductively coupled plasma mass spectrometry. *Journal of Analytical Atomic Spectrometry*, **16**, 449-456.
- Hamilton, P. J., O'Nions, R. K., Bridgwater, D. & Nutman, A. 1983. Sm-Nd studies of Archaean metasediments and metavolcanics from West Greenland and their implications for the Earth's early history. *Earth and Planetary Science Letters*, **62**, 263-272.
- Horstwood, M. S., Foster, G. L., Parrish, R. R., Noble, S. R. & Nowell, G. M. 2003. Common-Pb corrected in situ U–Pb accessory mineral geochronology by LA-MC-ICP-MS. *Journal of Analytical Atomic Spectrometry*, **18**, 837-846.
- Jackson, S. E., Pearson, N. J., Griffin, W. L. & Belousova, E. A. 2004. The application of laser ablation-inductively coupled plasma-mass spectrometry to in situ U–Pb zircon geochronology. *Chemical Geology*, **211**, 47-69.
- Jaffey, A., Flynn, K., Glendenin, L., Bentley, W. t. & Essling, A. 1971. Precision Measurement of Half-Lives and Specific Activities of  $^{235}\text{U}$  and  $^{238}\text{U}$ . *Physical Review C*, **4**, 1889.
- O'Nions, R. K., Hamilton, P. J. & Evensen, N. M. 1977. Variations in  $^{143}\text{Nd}/^{144}\text{Nd}$  and  $^{87}\text{Sr}/^{86}\text{Sr}$  ratios in oceanic basalts. *Earth and Planetary Science Letters*, **34**, 13-22.
- Pin, C. & Zalduegui, J. S. 1997. Sequential separation of light rare-earth elements, thorium and uranium by miniaturized extraction chromatography: Application to isotopic analyses of silicate rocks. *Analytica Chimica Acta*, **339**, 79-89.
- Raczek, I., Jochum, K. P. & Hofmann, A. W. 2003. Neodymium and Strontium Isotope Data for USGS Reference Materials BCR-1, BCR-2, BHVO-1, BHVO-2, AGV-1, AGV-2, GSP-1, GSP-2 and Eight MPI-DING Reference Glasses. *Geostandards Newsletter*, **27**, 173-179.
- Sláma, J., Košler, J., Condon, D. J., et al. 2008. Plešovice zircon—a new natural reference material for U–Pb and Hf isotopic microanalysis. *Chemical Geology*, **249**, 1-35.
- Thomas, R., Jacobs, J., Horstwood, M., Ueda, K., Bingen, B. & Matola, R. 2010. The Mecubúri and Alto Benfica groups, NE Mozambique: aids to unravelling ca. 1 and 0.5 Ga events in the east African orogen. *Precambrian Research*, **178**, 72-90.
- Thomas, R. J., Roberts, N. M. W., Jacobs, J., Bushi, A. M., Horstwood, M. S. A. & Mruma, A. 2013. Structural and geochronological constraints on the evolution of the eastern margin of the Tanzania Craton in the Mpwapwa area, central Tanzania. *Precambrian Research*, **224**, 671-689.
- Wiedenbeck, M., Alle, P., Corfu, F., et al. 1995. Three natural zircon standards for U-Th-Pb, Lu-Hf, trace element and REE analyses. *Geostandards Newsletter*, **19**, 1-23.
